# Supplementary material for: Metal artifact reduction combined with deep learning image reconstruction algorithm for CT image quality optimization: a phantom study
Source: PeerJ. 2025 Jun 4;13:e19516. doi: 10.7717/peerj.19516 (PMC12145087; doi:10.7717/peerj.19516)
Supplement: Supplemental Information 1 [file peerj-13-19516-s001.xlsx]

## Sheet: Sheet1
dh-120-3-nomar	ct1-mean	ct1-std		dh-120-3-mar	ct2-mean	ct2-std			ar-120-3-nomar				ar-120-3-mar				dh-100-3-nomar				dh-100-3-mar				ar-100-3-nomar				ar-100-3-mar				dh-70-3-nomar				dh-70-3-mar				ar-70-3-nomar				ar-70-3-mar
inner	-894.083	56.0842	53.1763		-962.185	38.7591	34.7857			-881.488	68.5592	62.1048		-961.429	50.1068	38.8023		-844.655	71.4338	69.8125		-949.929	48.3516	44.6719		-848.417	74.316	68.5692		-958.952	60.6111	52.4553		-772.97	104.267	102.81		-969.667	36.0019	31.4825		-773.31	115.724	111.054		-968.804	42.9766	27.1287
	-895.11	66.2456	63.8025		-962.545	32.2156	27.306			-889.273	73.9425	68.001		-961.643	43.5691	29.8865		-848.786	61.1413	59.2389		-956.76	37.9862	33.1762		-854.461	81.5787	76.3804		-959.552	44.0187	31.8669		-778.396	79.4694	77.5474		-973.201	42.7503	39.0205		-785.896	90.2193	84.1453		-973.506	56.1682	45.2089
	-897.88	50.4171	47.1611		-967.492	35.4887	31.1002			-903.617	72.266	66.1741		-967.563	48.2414	36.3616		-859.443	53.5473	51.3644		-962.077	35.5686	30.3781		-862.219	69.3527	63.1559		-967.765	45.9301	34.4591		-795.213	83.2066	81.3729		-972.738	35.9459	31.4184		-796.492	109.522	104.575		-973.475	49.2231	36.22
	-927.385	43.0977	39.2389		-964.263	33.6072	28.9348			-890.314	95.6882	91.175		-963.263	46.4083	33.8919		-841.333	69.0936	67.416		-963.929	32.2058	26.3613		-864.192	68.3713	62.0766		-959.058	38.6076	23.8411		-790.551	82.1227	80.2643		-965.032	33.3527	28.4151		-794.91	102.332	97.0196		-963.904	45.8819	31.5297
	-907.924	47.8637	44.4209		-958.535	36.2194	31.9315			-892.5	93.2517	88.6145		-958.528	47.3926	35.2276		-862.66	58.2852	56.2864		-961.667	29.9452	23.546		-853	68.964	62.7288		-958.396	42.8027	30.165		-803.771	91.7497	90.0901		-968.104	36.1761	31.6815		-803.424	117.469	112.871		-969.167	47.8763	34.3674
out	-898.53	50.0416	46.7594		-958.713	31.1112	25.9938			-931.162	91.6785	86.9574		-958.97	40.0952	24.5471		-857.584	126.498	125.59		-954.994	27.2974	20.0711		-842.784	147.357	144.544		-952.254	41.1572	27.7807		-815.877	161.287	160.349		-952.772	53.1621	50.2118		-812.632	428.734	427.498		-952.94	154.861	151.232
	-840.172	69.2137	66.8791		-943.301	27.2638	21.2388			-865.589	80.4051	74.9775		-945.278	39.9465	24.3034		-785.838	106.641	105.561		-930.093	28.2889	21.4001		-757.788	273.595	272.09		-938.947	35.5837	18.5487		-683.818	124.779	123.564		-943.149	49.0532	45.8391		-690.732	222.302	219.907		-943.215	106.596	101.25
	-859.833	68.8649	66.518		-955.179	33.2147	28.4779			-874.224	92.9792	88.3276		-956.261	47.13	34.8736		-823.061	96.5796	95.3867		-941.933	46.0601	42.181		-808.552	229.626	227.831		-950.994	40.4122	26.6646		-751.461	115.39	114.075		-956.815	47.0498	43.6886		-754.615	262.056	260.027		-958.821	79.6303	72.3185
	-867.045	67.7349	65.3475		-948.196	28.8646	23.2581			-867.038	90.8002	86.0309		-949.365	42.7955	28.7469		-833.776	94.0931	92.8682		-936.849	39.9757	35.4367		-828.984	154.596	151.917		-945.958	43.6172	31.31		-783.888	114.474	113.148		-951.41	47.4225	44.0897		-785.785	262.965	260.944		-952.827	79.5471	72.2269
	-847.304	76.3642	74.2547		-943.071	29.4176	23.9409			-849.75	80.5499	75.1328		-945.041	42.4273	28.1958		-806.453	73.7623	72.1933		-931.963	35.0226	29.737		-791.307	223.292	221.446		-938.125	40.5204	26.8283		-723.682	96.9087	95.339		-942.986	43.1175	39.4224		-727.453	150.726	147.171		-942.473	67.4139	58.597
bk	-995.581	18.282	17.8247		-996.983	17.1364	17.0946			-996.838	27.9037	29.0405		-997.956	32.5655	31.7028		-994.733	14.84	15.133		-995.017	17.2208	18.5013		-996.667	28.7761	28.6553		-996.6	30.6949	30.3669		-993.587	16.9655	17.3717		-993.844	17.2099	17.4639		-993.533	32.7845	32.5435		-994.107	32.3324	33.332
	-995.206	18.7424			-997.015	15.9726				-996.951	30.302			-997.887	33.7169			-994.811	14.7364			-995.442	19.2976			-996.207	27.7329			-995.929	33.5321			-993.573	17.4708			-993.94	18.1106			-993.64	32.9172			-994.113	35.469
	-995.307	19.0924			-996.733	16.5998				-996.497	29.3613			-996.864	30.1326			-995.795	15.2632			-994.247	18.8761			-994.771	30.6811			-995.985	29.6107			-994.127	17.3028			-993.863	16.7537			-994.06	31.7993			-993.76	30.9029
	-995.602	15.7636			-997.609	18.1537				-996.105	27.328			-997.194	29.569			-994.86	15.6837			-994.396	19.1861			-995.574	28.1655			-996.417	29.4005			-993.708	17.8091			-993.667	16.3839			-993.613	33.5236			-993.936	30.2672
	-995.737	17.2432			-997.6	17.6107				-996.104	30.3077			-997.355	32.53			-995.224	15.1419			-995.757	17.9259			-996.886	27.921			-996.875	28.5962			-994.309	17.3105			-994.556	18.8616			-994.118	31.6929			-994.595	37.6883
	-892.494	67.0364	64.7474		-962.167	41.2271	37.6569			-893.22	66.0893	58.6509		-961.548	49.9628	39.8945		-845.792	71.9536	70.2232		-971.339	30.6654	25.6407		-849.333	96.4406	92.0413		-970.964	40.2127	21.6687		-777.054	112.041	110.686		-953.238	45.5862	40.9399		-778.226	118.313	113.661		-958.019	49.5537	33.7258
	-889.357	61.0947	58.574		-963.584	33.6234	29.1359			-890.006	73.8372	67.2612		-963.773	42.0284	29.3542		-847.89	52.8882	50.5086		-962.987	34.947	30.6328		-852.032	67.4017	60.9409		-962.318	42.6197	25.8633		-773.383	89.4144	87.7108		-963.247	41.8048	36.6826		-781.812	80.7709	73.7884		-966.536	50.9094	35.6879
	-902.53	47.2268	43.9172		-966.115	40.7392	37.1222			-904.65	57.1	48.2965		-966.77	51.8556	42.2408		-862.546	66.9647	65.1017		-967.836	32.0428	27.273		-863.858	88.6552	83.8483		-967.355	40.6269	22.4281		-793.869	94.5377	92.928		-965.896	37.8681	32.1243		-794.956	107.637	102.501		-962.87	54.6196	40.8064
	-903.16	52.007	49.0212		-963.532	36.4517	32.3589			-903.962	65.925	58.4657		-964.744	45.292	33.8623		-842.827	74.6024	72.9348		-964.545	33.5346	29.0112		-840.564	89.9774	85.2451		-962.506	40.0668	21.3967		-786.353	75.9972	73.9852		-954.692	30.9767	23.6121		-789.654	91.2114	85.0899		-955.03	57.9905	45.2191
	-892.014	49.9643	46.8485		-959.882	35.8147	31.6396			-892.299	53.2823	43.7167		-959.924	44.8647	33.2885		-863.125	58.5249	56.3837		-966.583	30.3782	25.2964		-863.354	70.8794	64.7665		-965.674	41.1589	23.3778		-793.931	78.6011	76.6575		-949.382	37.2613	31.4067		-792.167	88.5649	82.2467		-950.652	63.6851	52.3226
	-890.629	54.534	51.6943		-956.033	29.0584	23.7226			-889.192	95.724	90.7482		-956.189	36.2865	20.2977		-857.042	127.187	126.216		-955.003	36.2362	32.0957		-850.895	342.671	341.458		-952.725	72.0194	63.5552		-820.359	161.345	160.407		-952.015	36.5644	30.5767		-810.096	433.928	432.682		-953.38	59.4212	47.0398
	-833.245	72.0315	69.9062		-942.315	26.6706	20.7289			-837.199	196.098	193.718		-942.464	42.2804	29.7139		-785.937	111.039	109.925		-935.51	27.6618	21.9602		-796.344	213.585	211.635		-938.781	44.0754	28.1977		-684.781	137.153	136.048		-940.742	33.2108	26.4751		-692.854	262.694	260.632		-950.535	60.4083	48.2807
	-858.073	71.8019	69.6697		-955.812	31.2796	26.3967			-861.621	116.336	112.277		-956.176	46.1825	35.0444		-822	95.5576	94.2615		-936.482	27.3512	21.5676		-826.4	244.34	242.637		-936.085	49.1476	35.6083		-748.648	112.303	110.951		-949.182	42.5785	37.562		-753.788	221.77	219.324		-952.439	55.6683	42.1997
	-871.721	68.7466	66.5165		-949.5	29.2574	23.9659			-876.151	141.889	138.581		-949.599	41.8475	29.0946		-831.577	86.1627	84.7229		-941.202	31.8769	27.0779		-830.946	223.346	221.482		-939.92	46.2998	31.5617		-786.978	112.891	111.546		-950.942	39.8774	34.4701		-790.731	230.68	228.328		-941.963	51.1705	36.0595
	-843.372	89.4505	87.7482		-942.767	28.0005	22.4143			-847.412	268.972	267.241		-943.368	41.1997	28.1549		-804.855	79.0286	77.4563		-924.341	30.1499	25.0219		-814.939	164.767	162.231		-926.132	45.5825	30.4997		-720.591	98.3129	96.7661		-938.28	36.2066	30.1479		-723.628	168.83	165.603		-941.709	50.4765	35.0677
	-996.452	16.7677	17.368		-996.712	16.0618	16.7818			-996.876	29.7818	30.4608		-997.552	31.6532	30.0785		-994.811	15.801	15.6855		-995.602	16.7314	16.8204		-995.11	29.2702	28.7958		-995.996	33.1541	33.8752		-993.691	17.8689	17.3714		-996.55	19.6177	20.0505		-993.636	35.1167	32.8515		-996.104	41.2922	36.3062
	-994.994	17.6484			-996.374	16.5177				-995.758	31.3402			-997.18	29.615			-994.993	15.4818			-994.933	17.9405			-995.153	28.3594			-995.138	37.5277			-993.662	17.1822			-996.176	22.1741			-993.433	32.6714			-996.752	35.8468
	-995.228	17.4474			-996.143	16.6179				-995.515	29.9684			-996.347	29.3386			-995.514	15.1863			-995.024	16.343			-995.741	27.967			-995.185	31.7588			-993.375	16.6244			-995.363	20.2957			-993.45	30.9349			-995.357	36.1737
	-995.916	17.7923			-996.9	17.3267				-994.931	31.2919			-996.153	30.2939			-995.189	15.7838			-995.776	16.0432			-995.299	29.4442			-996.346	32.4611			-993.312	16.5572			-995.454	18.9299			-993.335	29.7223			-996.336	34.4671
	-996.606	17.1843			-997.211	17.3851				-996.803	29.9216			-996.67	29.4916			-995.662	16.1747			-994.375	17.0439			-996.143	28.938			-994.301	34.4744			-994.338	18.6245			-996.309	19.2352			-993.948	35.8123			-995.529	33.7511
	-881.446	67.0866	65.1587		-973.708	35.3544	31.3794			-895.429	58.6953	49.9976		-975.964	41.8813	27.6685		-849.179	68.9947	67.0349		-960.417	46.0993	43.176		-846.274	89.9069	85.331		-964.132	39.502	22.822		-724.119	93.8055	91.7841		-954.542	43.1531	38.4366		-728.054	84.7483	77.0404		-954.905	51.9824	37.9866
	-885.266	63.5058	61.4657		-961.305	31.5189	26.9848			-896.688	74.4479	67.802		-960.545	36.4396	18.4214		-850.136	66.8262	64.8009		-959.455	35.8805	32.038		-854.455	78.9645	73.7124		-964.045	40.7718	24.9555		-726.461	89.09	86.9591		-963.403	39.007	33.7154		-729.006	91.4047	84.3076		-963.429	50.2688	35.6057
	-900.022	64.7673	62.7683		-966.268	33.6924	29.4942			-899.585	55.5843	46.306		-964.377	39.8021	24.4071		-859.142	54.8948	52.4104		-967.016	37.8511	34.2306		-859.667	69.6979	63.6862		-962.104	44.0767	30.0531		-756.005	80.2475	77.875		-965.12	43.0443	38.3144		-762.383	88.354	80.9901		-965.579	62.9808	52.0326
	-889.038	60.1968	58.0405		-964.058	36.1508	32.2741			-925.365	64.7838	57.0225		-959.897	44.1566	31.005		-862.776	61.6422	59.4405		-959.712	37.793	34.1662		-840.276	92.3687	87.9211		-955.82	40.54	24.575		-763.833	80.091	77.7137		-956.571	36.5392	30.8268		-772.417	91.2538	84.144		-957.173	54.7079	41.6385
	-892.312	52.7531	50.2786		-966.882	31.7359	27.2379			-909.153	56.6197	47.5439		-964.479	39.9451	24.6396		-855.389	60.7382	58.5025		-957.833	41.4079	38.1266		-863.66	71.5123	65.6668		-954.448	48.0079	35.5696		-759.812	75.206	72.6691		-953.75	35.2887	29.3338		-764.125	104.489	98.3411		-952.875	45.9033	29.1192
	-931.74	53.0851	50.6269		-958.874	34.466	30.375			-898.841	82.2893	76.3292		-958.422	50.8221	39.9298		-844.201	78.7924	77.0821		-950.446	28.6827	23.7006		-853.237	334.131	332.929		-951.399	50.5305	38.9072		-849.237	102.338	100.488		-951.692	38.7156	33.3778		-846.198	118.908	113.543		-952.686	58.9163	47.0313
	-860.715	62.1125	60.0251		-945.215	26.8406	21.3343			-841.861	124.226	120.361		-945.629	41.1682	26.5767		-758.725	106.014	104.749		-937.381	25.6366	19.9062		-794.748	217.625	215.774		-943.879	86.4616	80.225		-676.474	93.4396	91.4101		-945.288	30.7914	23.7338		-679.07	105.747	99.6759		-946.573	43.3071	24.8256
	-870.864	63.6327	61.5969		-953.612	26.3464	20.7092			-862.903	104.008	99.3595		-953.7	40.6579	25.7792		-804.745	92.2124	90.7554		-948.676	31.7517	27.3348		-827.167	251.382	249.782		-935.831	59.3873	49.8727		-738.673	85.894	83.6817		-954.315	31.0918	24.1223		-741.133	94.6918	87.8607		-954.733	47.1213	31.0037
	-863.577	68.5558	66.6705		-953.926	27.9081	22.6626			-869.939	113.843	109.612		-951.878	40.8885	26.1414		-825.391	84.0872	82.4868		-945.061	32.664	28.3894		-832.17	234.121	232.403		-932.699	41.7956	26.5953		-745.798	99.1147	97.2038		-952.247	36.7217	31.0429		-747.308	105.305	99.207		-952.728	52.0381	38.0628
	-845.321	59.6707	57.4947		-941.821	23.1434	16.4424			-852	194.584	192.139		-943.068	34.8681	15.076		-785.514	101.602	100.282		-935.588	30.4102	25.7643		-815.699	140.841	137.965		-938.106	67.7201	59.5521		-709.72	85.2371	83.0074		-940.155	34.7284	28.6574		-721.595	93.0445	86.0828		-941.439	49.8059	34.9491
bk	-995.871	16.4383	15.967		-993.517	16.6495	16.2869			-996.09	29.9614	30.7469		-995.067	34.494	31.4404		-996.371	16.3926	16.3275		-996.549	16.2748	16.1548		-995.015	28.2158	28.3173		-995.591	33.6769	32.2423		-994.495	19.1585	19.3686		-995.832	20.2622	19.6168		-994.657	35.0115	35.3135		-995.842	38.4189	35.4851
	-996.11	15.2029			-994.295	15.726				-996.102	26.6546			-994.776	29.0476			-996.236	15.321			-995.873	17.8444			-995.089	28.395			-995.925	31.3506			-993.9	19.8389			-995.978	21.1187			-993.718	35.3496			-996.169	37.3399
	-996.489	15.8191			-994.704	16.1177				-995.575	33.2399			-994.919	31.289			-994.789	17.7098			-995.82	15.9077			-996.011	27.5487			-995.48	30.1452			-993.308	19.2108			-995.235	20.1243			-993.197	35.0305			-995.315	35.733
	-996.667	17.1061			-994.536	15.285				-995.404	33.0846			-994.267	30.5369			-995.477	16.337			-996.052	15.7435			-994.68	28.2177			-994.379	33.2498			-994.002	20.5977			-995.682	18.1366			-993.931	38.8198			-995.778	32.5789
	-996.924	15.2686			-995.076	17.6567				-995.745	30.7943			-993.419	31.8344			-996.581	15.8771			-996.556	15.0035			-995.137	29.2091			-994.303	32.7887			-995.319	18.037			-996.761	18.4423			-995.34	32.3563			-997.23	33.3547
dh-120-05-nomar				dh-120-05-mar					ar50-120-05-nomar				ar50-120-05-mar				dh-100-05-nomar				dh-100-05-mar				ar-100-05-nomar				ar-100-05-mar				dh-70-05-nomar			dh-70-05-mar				ar-70-05-nomar				ar-70-05-mar
inner	-859.869	101.445	93.6357		-950.257	67.0065	52.8064			-872.065	97.0833	77.0358		-966.401	79.7406	52.1109		-782.042	113.19	107.199		-957.113	59.3273	43.0618		-810.292	115.276	96.2449		-959.298	74.0335	39.765	-672.357	136.92	131.752		-951.738	66.6681	55.8537		-683.905	139.061	122.472		-938.345	104.167	82.1319
	-873.799	84.835	75.323		-966.006	55.9274	37.7693			-884.643	98.3165	78.5842		-962.89	70.8523	37.1082		-808.968	98.4069	91.4527		-963.929	62.4274	47.2416		-840.026	97.3023	73.7723		-964.695	84.9266	57.5571	-647.883	141.851	136.869		-968.578	62.0947	50.3065		-662.636	124.012	105.074		-960.838	85.2311	56.207
	-890.153	79.1302	68.8343		-967.638	54.1186	35.0352			-888.94	108.017	90.4267		-975.503	71.1342	37.6437		-833.607	86.6606	78.6749		-967.093	66.8721	52.9761		-847.328	105.974	84.8833		-969.24	84.7074	57.2332	-702.536	113.449	107.156		-973.344	60.0219	47.7244		-713.459	100.86	76.3814		-957.776	72.6417	34.2303
	-887.814	85.7846	76.3909		-963.148	65.2914	50.6124			-882.859	98.3441	78.6188		-965.555	74.3958	43.4937		-829.321	74.3743	64.8939		-963.878	56.221	38.6703		-856.449	87.363	60.0575		-967.635	75.2996	42.0751	-697.282	105.207	98.3876		-961.994	68.0909	57.5445		-711.994	104.824	81.5448		-953.917	84.7184	55.4264
	-881.118	89.9032	80.9885		-964.099	62.1669	46.512			-879.229	93.9197	73.0086		-965.191	63.118	18.4624		-815.278	77.8166	68.8121		-962.924	61.8507	46.4769		-849.104	89.604	63.2731		-964.826	80.5396	50.8617	-707.993	108.529	101.933		-956.75	60.0087	47.7079		-707.562	118.756	98.8153		-945.354	86.3931	57.9539
out	-905.249	67.3341	54.8675		-960.949	45.5837	19.4041			-914.329	115.29	99.0012		-957.409	68.6028	32.6085		-861.093	91.8526	84.3599		-957.997	45.6864	20.5386		-853.838	96.7642	73.0611		-955.862	59.3393	#NUM!	-882.32	123.518	117.763		-955.072	58.3586	45.6149		-875.21	140.392	123.981		-957.683	66.1492	16.4502
	-843.632	91.1137	82.3303		-943.346	41.3039	2.15819			-853.318	108.57	91.0869		-945.684	72.7029	40.5301		-758.983	91.0591	83.4952		-937.599	37.5528	#NUM!		-743.123	88.5169	61.724		-934.679	53.1034	#NUM!	-659.695	128.385	122.859		-947.801	57.4003	44.3823		-647.927	170.855	157.648		-949.315	73.9914	37.0083
	-864.364	81.1399	71.1355		-951.881	47.9443	24.4396			-884.709	101.657	82.7258		-957.78	74.9827	44.4902		-799.436	87.7127	79.8323		-950.079	49.1962	27.4745		-782.791	88.5137	61.7193		-948.042	63.9923	13.9751	-712.039	118.539	112.53		-962.088	51.7188	36.7401		-711.936	130.687	112.874		-961.367	71.5861	31.929
	-858.824	83.3312	73.625		-948.901	47.3646	23.2819			-889.782	89.5197	67.2541		-956.53	71.2139	37.7941		-806.205	91.8397	84.3458		-945.119	50.5268	29.7918		-792.276	89.7291	63.4502		-946.497	65.7826	20.6793	-777.276	128.011	122.469		-951.269	55.8219	42.3212		-755.449	142.704	126.594		-957.151	68.1686	23.2778
	-843.361	87.7912	78.6375		-944.244	44.5754	16.9001			-855.443	82.5683	57.679		-940.605	72.1118	39.4598		-766.912	87.166	79.2313		-941.53	43.3798	14.7105		-757.365	72.8027	35.7049		-939.747	62.8595	7.18366	-664.517	113.585	107.299		-944.72	60.9246	48.8549		-655.041	132.651	115.143		-947.591	66.5529	18.0051
bk	-994.596	43.5646	39.0312		-993.219	43.8077	41.2475			-994.836	61.3255	59.0818		-994.71	63.4538	60.3575		-996.358	35.3151	36.3362		-994.589	43.8706	40.8095		-995.541	66.4666	63.446		-994.792	67.2781	62.4477	-995.257	37.9493	37.2608		-993.893	38.4388	36.4006		-998.008	69.0607	65.8677		-996.208	62.3111	64.0711
	-994.88	37.1516			-993.978	41.8771				-994.313	60.1735			-993.504	60.6239			-996.111	37.6645			-994.74	39.4626			-994.64	62.9637			-994.824	61.7943		-994.998	36.2459			-995.382	32.977			-996.856	62.5682			-995.836	63.7739
	-997.01	35.8807			-993.562	39.9236				-994.561	57.6068			-993.229	55.2434			-996.747	36.4035			-993.755	42.0721			-993.732	64.7127			-994.532	62.8832		-994.696	36.5313			-993.871	35.7887			-994.865	62.1113			-994.85	62.9167
	-996.327	38.1543			-992.907	39.9456				-994.019	56.0886			-994.841	55.8962			-997.065	37.5045			-994.417	40.1354			-992.675	61.7241			-994.806	60.1412		-993.714	37.3616			-994.783	37.7313			-995.026	66.9338			-994.032	66.3257
	-995.029	40.405			-994.944	40.6834				-994.11	60.2145			-993.611	66.57			-996.282	34.7933			-994.764	38.5065			-995.232	61.3627			-994.888	60.1414		-995.861	38.2159			-995.378	37.0671			-995.734	68.6647			-997.01	65.0283
	-877.387	89.6298	79.5822		-966.012	56.1788	40.9238			-889.286	103.887	82.5228		-967.28	72.8967	42.4693		-792.012	96.6189	90.3895		-961.423	55.1874	43.3669		-799.155	92.1164	69.4944		-965.5	68.0267	36.2697	-710.827	129.862	124.273		-952.685	53.8022	36.4156		-711.006	131.074	114.888		-951.762	77.2978	44.1523
	-876.662	82.353	71.2871		-969.571	54.937	39.2017			-884.351	99.4072	76.8071		-964.63	72.4256	41.6555		-777.76	88.3013	81.4381		-968.468	55.8888	44.2561		-779.552	86.7087	62.1485		-967.24	66.8985	34.1068	-710.584	109.208	102.5		-959.481	59.0293	43.7708		-708.942	108.055	87.7196		-958.578	84.2667	55.4558
	-892.115	80.5514	69.198		-974.995	53.4911	37.1483			-901.514	86.7176	59.4768		-970.694	69.8042	36.91		-802.383	77.2182	69.2654		-966.71	58.4592	47.4608		-807.705	78.9821	50.8155		-969.213	72.3636	43.8674	-748.787	98.648	91.1659		-966.59	57.7782	42.0683		-746.475	117.83	99.5127		-967.202	79.5835	48.0418
	-907.724	70.1701	56.7774		-958.718	59.9504	45.9646			-922.84	89.0292	62.7992		-960.359	79.2325	52.6071		-806.244	66.2567	56.7891		-963.141	62.4392	52.2848		-813.583	88.9983	65.3049		-967.814	78.5027	53.3904	-757.686	104.407	97.3687		-953.801	62.4656	48.305		-763.269	124.632	107.48		-952.09	90.5902	64.6611
	-885.694	79.8494	68.3796		-966.243	66.5272	54.2638			-897.021	87.3927	60.4568		-967.486	80.3423	54.2641		-815.208	75.8241	67.7078		-962.84	60.7931	50.3075		-826.451	93.5515	71.3857		-968.785	73.7894	46.1815	-759.326	96.2501	88.5657		-947.472	53.923	36.5939		-761.271	112.391	93.0094		-946.146	80.0971	48.8878
	-901.326	66.3787	52.0189		-960.728	48.9236	30.2029			-902.341	84.5096	56.2086		-958.668	62.1859	18.8892		-906.356	82.4426	75.0455		-955.084	51.1131	38.0472		-907.802	95.0312	73.3142		-953.668	64.2428	28.5482	-850.985	138.476	133.249		-946.419	44.0781	19.3469		-848.332	152.181	138.485		-948.608	67.4943	23.0207
	-837.106	77.6403	65.7865		-946.944	40.7235	13.3079			-844.546	75.739	41.88		-944.331	59.0834	#NUM!		-783.275	87.8649	80.9648		-941.987	44.6864	28.843		-788.295	89.0313	65.3499		-937.394	58.7617	11.8659	-650.089	125.95	120.18		-946.331	47.6668	26.5244		-648.666	145.967	131.626		-941.709	71.7404	33.4838
	-856.248	77.5792	65.7143		-957.567	48.0171	28.7113			-860.282	77.2416	44.54		-953.539	59.4204	4.52767		-812.185	70.6243	61.8291		-956.13	48.6241	34.6316		-815.7	77.8371	49.0169		-953.239	58.9132	12.5948	-713.736	123.772	117.895		-964.685	49.813	30.2118		-706.2	139.818	124.772		-964.782	69.4883	28.3391
	-856.266	78.2214	66.4712		-954.234	51.6574	34.4554			-864.878	82.3735	52.9427		-950.638	72.8537	42.3955		-862.356	87.2951	80.346		-948.24	45.3532	29.8656		-864.942	94.1538	72.1732		-948.256	61.1997	20.8151	-752.891	127.884	122.206		-962.853	53.9033	36.5648		-749.853	149.925	136.002		-964.731	71.672	33.3369
	-841.699	81.6264	70.4464		-946.672	44.0952	21.5193			-855.318	82.9011	53.7599		-942.186	59.3736	3.86592		-792.909	76.7497	68.7428		-945.361	41.6846	23.9302		-802.341	84.4316	58.9298		-941.622	57.3398	#NUM!	-678.639	106.885	100.021		-948.399	55.3774	38.705		-675.436	129.52	113.112		-945.041	80.3302	49.2688
	-993.743	40.5966	41.2331		-995.227	37.8017	38.4877			-993.737	60.8875	63.1067		-995.754	59.0589	59.2477		-995.335	32.8887	34.1314		-995.299	38.7281	37.0831		-995.678	58.2481	60.4646		-995.926	60.0337	57.5512	-996.303	36.5142	37.6856		-995.486	36.4053	39.6053		-997.726	60.4598	63.0959		-995.032	62.3303	63.447
	-993.109	38.7286			-993.984	38.5327				-993.122	61.6072			-994.062	58.1908			-993.844	35.3286			-994.904	36.7389			-993.182	63.9221			-994.707	57.1269		-996.62	39.0455			-995.104	40.1645			-996.889	67.7749			-995.2	63.3851
	-993.889	41.077			-996.083	37.2694				-994.096	64.1462			-996.651	58.1072			-994.398	31.8388			-996.016	35.9128			-995.122	58.0842			-996.476	55.8892		-995.524	37.2558			-993.904	41.0753			-995.66	62.629			-994.181	65.1859
	-993.492	41.9147			-996.065	38.1868				-993.613	63.8209			-996.237	60.1588			-993.286	36.2373			-996.114	36.7797			-992.781	64.2152			-996.275	56.3555		-994.852	36.8809			-994.43	41.1265			-994.807	60.4909			-994.976	65.686
	-993.411	43.8485			-993.701	40.6481				-993.388	65.0719			-992.873	60.7225			-993.693	34.3638			-996.546	37.2561			-993.784	57.8533			-996.969	58.3507		-996.008	38.7316			-996.585	39.2548			-994.66	64.1249			-996.832	60.6477
	-863.179	98.5257	92.7185		-963.263	62.3639	52.5052			-874.524	91.2514	68.5182		-949.102	81.0316	51.3545		-800.988	108.906	100.764		-962.869	54.9075	41.1012		-791.452	101.603	83.4734		-963.696	73.3987	45.2626	-683.315	149.698	145.208		-935.679	88.707	79.5521		-677.399	122.303	100.608		-950.149	82.632	48.9878
	-873.584	87.2813	80.6686		-960.649	60.421	50.1821			-883.494	94.267	72.4857		-959.442	81.0411	51.3696		-832.032	90.2349	80.2202		-962.805	56.0247	42.5822		-816.695	100.055	81.5813		-962.442	78.6321	53.3324	-664.455	137.265	132.354		-958.994	66.1086	53.1974		-641.864	133.624	114.103		-969.987	75.8816	36.4659
	-878.951	93.6957	87.5687		-973.989	54.2876	42.5991			-900.552	81.9195	55.4863		-963.054	73.6032	38.5824		-841.148	89.5333	79.4302		-975.913	64.1602	52.83		-841.574	106.914	89.8618		-978.579	83.587	60.3997	-708.918	110.459	104.294		-958.41	55.1953	38.809		-704.027	105.659	79.5483		-973.191	74.8624	34.2946
	-873.321	92.0462	85.8015		-964.168	64.4778	54.9993			-902.372	98.7485	78.2252		-965.4	83.1355	54.614		-849.788	68.9489	55.1987		-967.314	58.6319	45.9584		-844.628	96.4579	77.128		-970.128	68.5332	36.8529	-709.321	111.069	104.94		-952.526	61.0331	46.7403		-694.769	109.339	84.3752		-958.962	84.6888	52.3826
	-870.715	79.9663	72.6912		-966.184	49.2275	35.929			-893.833	100.246	80.1069		-964.39	82.3832	53.4618		-835.938	67.3076	53.1343		-964.292	63.7931	52.3836		-824.236	106.785	89.7086		-966.09	78.6268	53.3247	-711.104	118.538	112.816		-943.896	62.9034	49.1574		-710.111	110.309	85.6283		-953.146	83.8276	50.9785
	-913.186	74.0534	66.131		-956.051	52.1377	39.8231			-907.958	77.83	49.2486		-960.919	54.3308	#NUM!		-854.979	87.1047	76.6823		-954.237	47.7436	30.8858		-861.317	101.05	82.7986		-952.844	63.1454	25.4692	-874.365	119.2	113.511		-958.335	50.2332	31.3527		-889.539	125.624	104.62		-953.59	92.3164	63.9849
	-848.318	90.3988	84.0318		-947.814	50.0224	37.0106			-852.036	86.9985	62.7428		-941.645	58.0894	#NUM!		-742.106	98.4589	89.3706		-937.719	45.5763	27.4167		-760.47	87.8117	65.9962		-933.046	70.5229	40.4329	-651.924	148.129	143.591		-951.841	60.8699	46.5271		-657.526	145.91	128.273		-944.821	86.2443	54.862
	-871.233	77.0973	69.5226		-959.364	51.8641	39.4642			-870.93	79.5336	51.899		-949.722	62.1703	#NUM!		-786.527	93.1098	83.4409		-958.964	50.7162	35.3073		-797.791	82.5442	58.806		-958.479	71.0915	41.4167	-708.388	118.512	112.788		-962.118	53.9172	36.9687		-709.009	135.926	116.79		-961.788	76.0324	36.7787
	-882.801	76.0519	68.3615		-958.888	50.3326	37.4288			-869.702	82.3735	56.1543		-942.553	60.009	#NUM!		-790.096	91.0406	81.1255		-957.962	54.6041	40.695		-812.878	96.8987	77.6785		-959.157	78.6566	53.3686	-759.526	136.809	131.881		-958.612	50.4392	31.6817		-772.311	137.447	118.557		-951.26	79.8649	44.1605
	-843.976	70.4424	62.0607		-949.505	45.7366	30.9738			-853.584	87.4705	63.3956		-940.074	61.6587	#NUM!		-755.905	83.1145	72.1178		-948.625	49.9759	34.2355		-773.196	82.3114	58.4787		-948.922	68.2731	36.3669	-658.095	123.563	118.084		-950.02	53.1705	35.8708		-661.524	126.959	106.22		-943.365	86.1608	54.7305
	-994.771	34.0599	33.3257		-994.674	36.0806	33.652			-994.728	66.7763	60.2668		-993.28	66.7032	62.6804		-994.743	41.8423	41.3165		-995.394	35.433	36.4078		-996.507	57.906	57.9259		-995.297	57.8449	57.7811	-997.118	38.3379	36.3859		-996.368	38.7585	39.2477		-994.945	69.0549	69.5407		-993.381	74.6445	66.5451
	-994.087	32.9291			-993.666	32.2742				-995.076	57.7903			-994.381	64.0661			-994.062	41.6705			-994.884	34.797			-996.024	59.867			-995.102	55.583		-996.569	33.2649			-996.004	40.5694			-994.527	71.5367			-995.693	60.2364
	-994.37	32.8621			-993.373	31.6845				-997.473	55.454			-993.546	61.1513			-993.625	41.4404			-994.331	35.6767			-996.986	58.4346			-994.595	56.5421		-995.003	34.6597			-995.004	37.0107			-994.554	67.4305			-993.516	63.2984
	-994.022	31.6796			-994.634	32.394				-996.576	59.0004			-993.159	59.8319			-993.176	40.141			-995.323	39.4997			-997.443	57.3913			-995.871	60.5661		-995.402	38.5225			-994.415	40.1828			-993.316	68.8358			-994.963	67.8078
	-994.257	35.0976			-993.651	35.8268				-995.106	62.313			-995.721	61.6493			-994.786	41.4882			-996.071	36.6323			-996.458	56.0305			-995.903	58.3694		-995.139	37.1447			-996.956	39.7171			-995.554	70.8458			-994.519	66.7385

## Sheet: Sheet2
dh-120-3-nomar				dh-120-3-mar					ar-120-3-nomar				ar-120-3-mar				dh-100-3-nomar				dh-100-3-mar				ar-100-3-nomar				ar-100-3-mar				dh-70-3-nomar				dh-70-3-mar				ar-70-3-nomar				ar-70-3-mar
inner			53.1763				34.7857					62.1048				38.8023				69.8125				44.6719				68.5692				52.4553				102.81				31.4825				111.054				27.1287
			63.8025				27.306					68.001				29.8865				59.2389				33.1762				76.3804				31.8669				77.5474				39.0205				84.1453				45.2089
			47.1611				31.1002					66.1741				36.3616				51.3644				30.3781				63.1559				34.4591				81.3729				31.4184				104.575				36.22
			39.2389				28.9348					91.175				33.8919				67.416				26.3613				62.0766				23.8411				80.2643				28.4151				97.0196				31.5297
			44.4209				31.9315					88.6145				35.2276				56.2864				23.546				62.7288				30.165				90.0901				31.6815				112.871				34.3674
out			46.7594				25.9938					86.9574				24.5471				125.59				20.0711				144.544				27.7807				160.349				50.2118				427.498				151.232
			66.8791				21.2388					74.9775				24.3034				105.561				21.4001				272.09				18.5487				123.564				45.8391				219.907				101.25
			66.518				28.4779					88.3276				34.8736				95.3867				42.181				227.831				26.6646				114.075				43.6886				260.027				72.3185
			65.3475				23.2581					86.0309				28.7469				92.8682				35.4367				151.917				31.31				113.148				44.0897				260.944				72.2269
			74.2547				23.9409					75.1328				28.1958				72.1933				29.737				221.446				26.8283				95.339				39.4224				147.171				58.597
bk			17.8247				17.0946					29.0405				31.7028				15.133				18.5013				28.6553				30.3669				17.3717				17.4639				32.5435				33.332
	-995.206	18.7424			-997.015	15.9726				-996.951	30.302			-997.887	33.7169			-994.811	14.7364			-995.442	19.2976			-996.207	27.7329			-995.929	33.5321			-993.573	17.4708			-993.94	18.1106			-993.64	32.9172			-994.113	35.469
	-995.307	19.0924			-996.733	16.5998				-996.497	29.3613			-996.864	30.1326			-995.795	15.2632			-994.247	18.8761			-994.771	30.6811			-995.985	29.6107			-994.127	17.3028			-993.863	16.7537			-994.06	31.7993			-993.76	30.9029
	-995.602	15.7636			-997.609	18.1537				-996.105	27.328			-997.194	29.569			-994.86	15.6837			-994.396	19.1861			-995.574	28.1655			-996.417	29.4005			-993.708	17.8091			-993.667	16.3839			-993.613	33.5236			-993.936	30.2672
	-995.737	17.2432			-997.6	17.6107				-996.104	30.3077			-997.355	32.53			-995.224	15.1419			-995.757	17.9259			-996.886	27.921			-996.875	28.5962			-994.309	17.3105			-994.556	18.8616			-994.118	31.6929			-994.595	37.6883
			64.7474				37.6569					58.6509				39.8945				70.2232				25.6407				92.0413				21.6687				110.686				40.9399				113.661				33.7258
			58.574				29.1359					67.2612				29.3542				50.5086				30.6328				60.9409				25.8633				87.7108				36.6826				73.7884				35.6879
			43.9172				37.1222					48.2965				42.2408				65.1017				27.273				83.8483				22.4281				92.928				32.1243				102.501				40.8064
			49.0212				32.3589					58.4657				33.8623				72.9348				29.0112				85.2451				21.3967				73.9852				23.6121				85.0899				45.2191
			46.8485				31.6396					43.7167				33.2885				56.3837				25.2964				64.7665				23.3778				76.6575				31.4067				82.2467				52.3226
			51.6943				23.7226					90.7482				20.2977				126.216				32.0957				341.458				63.5552				160.407				30.5767				432.682				47.0398
			69.9062				20.7289					193.718				29.7139				109.925				21.9602				211.635				28.1977				136.048				26.4751				260.632				48.2807
			69.6697				26.3967					112.277				35.0444				94.2615				21.5676				242.637				35.6083				110.951				37.562				219.324				42.1997
			66.5165				23.9659					138.581				29.0946				84.7229				27.0779				221.482				31.5617				111.546				34.4701				228.328				36.0595
			87.7482				22.4143					267.241				28.1549				77.4563				25.0219				162.231				30.4997				96.7661				30.1479				165.603				35.0677
			17.368				16.7818					30.4608				30.0785				15.6855				16.8204				28.7958				33.8752				17.3714				20.0505				32.8515				36.3062
	-994.994	17.6484			-996.374	16.5177				-995.758	31.3402			-997.18	29.615			-994.993	15.4818			-994.933	17.9405			-995.153	28.3594			-995.138	37.5277			-993.662	17.1822			-996.176	22.1741			-993.433	32.6714			-996.752	35.8468
	-995.228	17.4474			-996.143	16.6179				-995.515	29.9684			-996.347	29.3386			-995.514	15.1863			-995.024	16.343			-995.741	27.967			-995.185	31.7588			-993.375	16.6244			-995.363	20.2957			-993.45	30.9349			-995.357	36.1737
	-995.916	17.7923			-996.9	17.3267				-994.931	31.2919			-996.153	30.2939			-995.189	15.7838			-995.776	16.0432			-995.299	29.4442			-996.346	32.4611			-993.312	16.5572			-995.454	18.9299			-993.335	29.7223			-996.336	34.4671
	-996.606	17.1843			-997.211	17.3851				-996.803	29.9216			-996.67	29.4916			-995.662	16.1747			-994.375	17.0439			-996.143	28.938			-994.301	34.4744			-994.338	18.6245			-996.309	19.2352			-993.948	35.8123			-995.529	33.7511
			65.1587				31.3794					49.9976				27.6685				67.0349				43.176				85.331				22.822				91.7841				38.4366				77.0404				37.9866
			61.4657				26.9848					67.802				18.4214				64.8009				32.038				73.7124				24.9555				86.9591				33.7154				84.3076				35.6057
			62.7683				29.4942					46.306				24.4071				52.4104				34.2306				63.6862				30.0531				77.875				38.3144				80.9901				52.0326
			58.0405				32.2741					57.0225				31.005				59.4405				34.1662				87.9211				24.575				77.7137				30.8268				84.144				41.6385
			50.2786				27.2379					47.5439				24.6396				58.5025				38.1266				65.6668				35.5696				72.6691				29.3338				98.3411				29.1192
			50.6269				30.375					76.3292				39.9298				77.0821				23.7006				332.929				38.9072				100.488				33.3778				113.543				47.0313
			60.0251				21.3343					120.361				26.5767				104.749				19.9062				215.774				80.225				91.4101				23.7338				99.6759				24.8256
			61.5969				20.7092					99.3595				25.7792				90.7554				27.3348				249.782				49.8727				83.6817				24.1223				87.8607				31.0037
			66.6705				22.6626					109.612				26.1414				82.4868				28.3894				232.403				26.5953				97.2038				31.0429				99.207				38.0628
			57.4947				16.4424					192.139				15.076				100.282				25.7643				137.965				59.5521				83.0074				28.6574				86.0828				34.9491
bk			15.967				16.2869					30.7469				31.4404				16.3275				16.1548				28.3173				32.2423				19.3686				19.6168				35.3135				35.4851
	-996.11	15.2029			-994.295	15.726				-996.102	26.6546			-994.776	29.0476			-996.236	15.321			-995.873	17.8444			-995.089	28.395			-995.925	31.3506			-993.9	19.8389			-995.978	21.1187			-993.718	35.3496			-996.169	37.3399
	-996.489	15.8191			-994.704	16.1177				-995.575	33.2399			-994.919	31.289			-994.789	17.7098			-995.82	15.9077			-996.011	27.5487			-995.48	30.1452			-993.308	19.2108			-995.235	20.1243			-993.197	35.0305			-995.315	35.733
	-996.667	17.1061			-994.536	15.285				-995.404	33.0846			-994.267	30.5369			-995.477	16.337			-996.052	15.7435			-994.68	28.2177			-994.379	33.2498			-994.002	20.5977			-995.682	18.1366			-993.931	38.8198			-995.778	32.5789
	-996.924	15.2686			-995.076	17.6567				-995.745	30.7943			-993.419	31.8344			-996.581	15.8771			-996.556	15.0035			-995.137	29.2091			-994.303	32.7887			-995.319	18.037			-996.761	18.4423			-995.34	32.3563			-997.23	33.3547
dh-120-05-nomar				dh-120-05-mar					ar50-120-05-nomar				ar50-120-05-mar				dh-100-05-nomar				dh-100-05-mar				ar-100-05-nomar				ar-100-05-mar				dh-70-05-nomar			dh-70-05-mar				ar-70-05-nomar				ar-70-05-mar
inner			93.6357				52.8064					77.0358				52.1109				107.199				43.0618				96.2449				39.765			131.752				55.8537				122.472				82.1319
			75.323				37.7693					78.5842				37.1082				91.4527				47.2416				73.7723				57.5571			136.869				50.3065				105.074				56.207
			68.8343				35.0352					90.4267				37.6437				78.6749				52.9761				84.8833				57.2332			107.156				47.7244				76.3814				34.2303
			76.3909				50.6124					78.6188				43.4937				64.8939				38.6703				60.0575				42.0751			98.3876				57.5445				81.5448				55.4264
			80.9885				46.512					73.0086				18.4624				68.8121				46.4769				63.2731				50.8617			101.933				47.7079				98.8153				57.9539
out			54.8675				19.4041					99.0012				32.6085				84.3599				20.5386				73.0611				0			117.763				45.6149				123.981				16.4502
			82.3303				2.15819					91.0869				40.5301				83.4952				0				61.724				0			122.859				44.3823				157.648				37.0083
			71.1355				24.4396					82.7258				44.4902				79.8323				27.4745				61.7193				13.9751			112.53				36.7401				112.874				31.929
			73.625				23.2819					67.2541				37.7941				84.3458				29.7918				63.4502				20.6793			122.469				42.3212				126.594				23.2778
			78.6375				16.9001					57.679				39.4598				79.2313				14.7105				35.7049				7.18366			107.299				48.8549				115.143				18.0051
bk			39.0312				41.2475					59.0818				60.3575				36.3362				40.8095				63.446				62.4477			37.2608				36.4006				65.8677				64.0711
	-994.88	37.1516			-993.978	41.8771				-994.313	60.1735			-993.504	60.6239			-996.111	37.6645			-994.74	39.4626			-994.64	62.9637			-994.824	61.7943		-994.998	36.2459			-995.382	32.977			-996.856	62.5682			-995.836	63.7739
	-997.01	35.8807			-993.562	39.9236				-994.561	57.6068			-993.229	55.2434			-996.747	36.4035			-993.755	42.0721			-993.732	64.7127			-994.532	62.8832		-994.696	36.5313			-993.871	35.7887			-994.865	62.1113			-994.85	62.9167
	-996.327	38.1543			-992.907	39.9456				-994.019	56.0886			-994.841	55.8962			-997.065	37.5045			-994.417	40.1354			-992.675	61.7241			-994.806	60.1412		-993.714	37.3616			-994.783	37.7313			-995.026	66.9338			-994.032	66.3257
	-995.029	40.405			-994.944	40.6834				-994.11	60.2145			-993.611	66.57			-996.282	34.7933			-994.764	38.5065			-995.232	61.3627			-994.888	60.1414		-995.861	38.2159			-995.378	37.0671			-995.734	68.6647			-997.01	65.0283
			79.5822				40.9238					82.5228				42.4693				90.3895				43.3669				69.4944				36.2697			124.273				36.4156				114.888				44.1523
			71.2871				39.2017					76.8071				41.6555				81.4381				44.2561				62.1485				34.1068			102.5				43.7708				87.7196				55.4558
			69.198				37.1483					59.4768				36.91				69.2654				47.4608				50.8155				43.8674			91.1659				42.0683				99.5127				48.0418
			56.7774				45.9646					62.7992				52.6071				56.7891				52.2848				65.3049				53.3904			97.3687				48.305				107.48				64.6611
			68.3796				54.2638					60.4568				54.2641				67.7078				50.3075				71.3857				46.1815			88.5657				36.5939				93.0094				48.8878
			52.0189				30.2029					56.2086				18.8892				75.0455				38.0472				73.3142				28.5482			133.249				19.3469				138.485				23.0207
			65.7865				13.3079					41.88				0				80.9648				28.843				65.3499				11.8659			120.18				26.5244				131.626				33.4838
			65.7143				28.7113					44.54				4.52767				61.8291				34.6316				49.0169				12.5948			117.895				30.2118				124.772				28.3391
			66.4712				34.4554					52.9427				42.3955				80.346				29.8656				72.1732				20.8151			122.206				36.5648				136.002				33.3369
			70.4464				21.5193					53.7599				3.86592				68.7428				23.9302				58.9298				0			100.021				38.705				113.112				49.2688
			41.2331				38.4877					63.1067				59.2477				34.1314				37.0831				60.4646				57.5512			37.6856				39.6053				63.0959				63.447
	-993.109	38.7286			-993.984	38.5327				-993.122	61.6072			-994.062	58.1908			-993.844	35.3286			-994.904	36.7389			-993.182	63.9221			-994.707	57.1269		-996.62	39.0455			-995.104	40.1645			-996.889	67.7749			-995.2	63.3851
	-993.889	41.077			-996.083	37.2694				-994.096	64.1462			-996.651	58.1072			-994.398	31.8388			-996.016	35.9128			-995.122	58.0842			-996.476	55.8892		-995.524	37.2558			-993.904	41.0753			-995.66	62.629			-994.181	65.1859
	-993.492	41.9147			-996.065	38.1868				-993.613	63.8209			-996.237	60.1588			-993.286	36.2373			-996.114	36.7797			-992.781	64.2152			-996.275	56.3555		-994.852	36.8809			-994.43	41.1265			-994.807	60.4909			-994.976	65.686
	-993.411	43.8485			-993.701	40.6481				-993.388	65.0719			-992.873	60.7225			-993.693	34.3638			-996.546	37.2561			-993.784	57.8533			-996.969	58.3507		-996.008	38.7316			-996.585	39.2548			-994.66	64.1249			-996.832	60.6477
			92.7185				52.5052					68.5182				51.3545				100.764				41.1012				83.4734				45.2626			145.208				79.5521				100.608				48.9878
			80.6686				50.1821					72.4857				51.3696				80.2202				42.5822				81.5813				53.3324			132.354				53.1974				114.103				36.4659
			87.5687				42.5991					55.4863				38.5824				79.4302				52.83				89.8618				60.3997			104.294				38.809				79.5483				34.2946
			85.8015				54.9993					78.2252				54.614				55.1987				45.9584				77.128				36.8529			104.94				46.7403				84.3752				52.3826
			72.6912				35.929					80.1069				53.4618				53.1343				52.3836				89.7086				53.3247			112.816				49.1574				85.6283				50.9785
			66.131				39.8231					49.2486				0				76.6823				30.8858				82.7986				25.4692			113.511				31.3527				104.62				63.9849
			84.0318				37.0106					62.7428				0				89.3706				27.4167				65.9962				40.4329			143.591				46.5271				128.273				54.862
			69.5226				39.4642					51.899				0				83.4409				35.3073				58.806				41.4167			112.788				36.9687				116.79				36.7787
			68.3615				37.4288					56.1543				0				81.1255				40.695				77.6785				53.3686			131.881				31.6817				118.557				44.1605
			62.0607				30.9738					63.3956				0				72.1178				34.2355				58.4787				36.3669			118.084				35.8708				106.22				54.7305
			33.3257				33.652					60.2668				62.6804				41.3165				36.4078				57.9259				57.7811			36.3859				39.2477				69.5407				66.5451
	-994.087	32.9291			-993.666	32.2742				-995.076	57.7903			-994.381	64.0661			-994.062	41.6705			-994.884	34.797			-996.024	59.867			-995.102	55.583		-996.569	33.2649			-996.004	40.5694			-994.527	71.5367			-995.693	60.2364
	-994.37	32.8621			-993.373	31.6845				-997.473	55.454			-993.546	61.1513			-993.625	41.4404			-994.331	35.6767			-996.986	58.4346			-994.595	56.5421		-995.003	34.6597			-995.004	37.0107			-994.554	67.4305			-993.516	63.2984
	-994.022	31.6796			-994.634	32.394				-996.576	59.0004			-993.159	59.8319			-993.176	40.141			-995.323	39.4997			-997.443	57.3913			-995.871	60.5661		-995.402	38.5225			-994.415	40.1828			-993.316	68.8358			-994.963	67.8078
	-994.257	35.0976			-993.651	35.8268				-995.106	62.313			-995.721	61.6493			-994.786	41.4882			-996.071	36.6323			-996.458	56.0305			-995.903	58.3694		-995.139	37.1447			-996.956	39.7171			-995.554	70.8458			-994.519	66.7385

## Sheet: AI
dh-120-3-nomar	dh-120-3-mar	ar-120-3-nomar	ar-120-3-mar	dh-100-3-nomar	dh-100-3-mar	ar-100-3-nomar	ar-100-3-mar	dh-70-3-nomar	dh-70-3-mar	ar-70-3-nomar	ar-70-3-mar
53.1763	34.79	62.1048	38.8023	69.81	44.67	68.57	52.4553	102.81	31.4825	111.054	27.1287
63.8025	27.31	68.001	29.8865	59.24	33.18	76.38	31.8669	77.5474	39.0205	84.1453	45.2089
47.1611	31.1	66.1741	36.3616	51.36	30.38	63.16	34.4591	81.3729	31.4184	104.575	36.22
39.2389	28.93	91.175	33.8919	67.42	26.36	62.08	23.8411	80.2643	28.4151	97.0196	31.5297
44.4209	31.93	88.6145	35.2276	56.29	23.55	62.73	30.165	90.0901	31.6815	112.871	34.3674
46.7594	25.99	86.9574	24.5471	125.59	20.07	144.54	27.7807	160.349	50.2118	427.498	151.232
66.8791	21.24	74.9775	24.3034	105.56	21.4	272.09	18.5487	123.564	45.8391	219.907	101.25
66.518	28.48	88.3276	34.8736	95.39	42.18	227.83	26.6646	114.075	43.6886	260.027	72.3185
65.3475	23.26	86.0309	28.7469	92.87	35.44	151.92	31.31	113.148	44.0897	260.944	72.2269
74.2547	23.94	75.1328	28.1958	72.19	29.74	221.45	26.8283	95.339	39.4224	147.171	58.597
64.7474	37.6569	58.6509	39.8945	70.2232	25.6407	92.0413	21.6687	110.686	40.9399	113.661	33.7258
58.574	29.1359	67.2612	29.3542	50.5086	30.6328	60.9409	25.8633	87.7108	36.6826	73.7884	35.6879
43.9172	37.1222	48.2965	42.2408	65.1017	27.273	83.8483	22.4281	92.928	32.1243	102.501	40.8064
49.0212	32.3589	58.4657	33.8623	72.9348	29.0112	85.2451	21.3967	73.9852	23.6121	85.0899	45.2191
46.8485	31.6396	43.7167	33.2885	56.3837	25.2964	64.7665	23.3778	76.6575	31.4067	82.2467	52.3226
51.6943	23.7226	90.7482	20.2977	126.216	32.0957	341.458	63.5552	160.407	30.5767	432.682	47.0398
69.9062	20.7289	193.718	29.7139	109.925	21.9602	211.635	28.1977	136.048	26.4751	260.632	48.2807
69.6697	26.3967	112.277	35.0444	94.2615	21.5676	242.637	35.6083	110.951	37.562	219.324	42.1997
66.5165	23.9659	138.581	29.0946	84.7229	27.0779	221.482	31.5617	111.546	34.4701	228.328	36.0595
87.7482	22.4143	267.241	28.1549	77.4563	25.0219	162.231	30.4997	96.7661	30.1479	165.603	35.0677
65.1587	31.3794	49.9976	27.6685	67.0349	43.176	85.331	22.822	91.7841	38.4366	77.0404	37.9866
61.4657	26.9848	67.802	18.4214	64.8009	32.038	73.7124	24.9555	86.9591	33.7154	84.3076	35.6057
62.7683	29.4942	46.306	24.4071	52.4104	34.2306	63.6862	30.0531	77.875	38.3144	80.9901	52.0326
58.0405	32.2741	57.0225	31.005	59.4405	34.1662	87.9211	24.575	77.7137	30.8268	84.144	41.6385
50.2786	27.2379	47.5439	24.6396	58.5025	38.1266	65.6668	35.5696	72.6691	29.3338	98.3411	29.1192
50.6269	30.375	76.3292	39.9298	77.0821	23.7006	332.929	38.9072	100.488	33.3778	113.543	47.0313
60.0251	21.3343	120.361	26.5767	104.749	19.9062	215.774	80.225	91.4101	23.7338	99.6759	24.8256
61.5969	20.7092	99.3595	25.7792	90.7554	27.3348	249.782	49.8727	83.6817	24.1223	87.8607	31.0037
66.6705	22.6626	109.612	26.1414	82.4868	28.3894	232.403	26.5953	97.2038	31.0429	99.207	38.0628
57.4947	16.4424	192.139	15.076	100.282	25.7643	137.965	59.5521	83.0074	28.6574	86.0828	34.9491
93.6357	52.8064	77.0358	52.1109	107.199	43.0618	96.2449	39.765	131.752	55.8537	122.472	82.1319
75.323	37.7693	78.5842	37.1082	91.4527	47.2416	73.7723	57.5571	136.869	50.3065	105.074	56.207
68.8343	35.0352	90.4267	37.6437	78.6749	52.9761	84.8833	57.2332	107.156	47.7244	76.3814	34.2303
76.3909	50.6124	78.6188	43.4937	64.8939	38.6703	60.0575	42.0751	98.3876	57.5445	81.5448	55.4264
80.9885	46.512	73.0086	18.4624	68.8121	46.4769	63.2731	50.8617	101.933	47.7079	98.8153	57.9539
54.8675	19.4041	99.0012	32.6085	84.3599	20.5386	73.0611	0	117.763	45.6149	123.981	16.4502
82.3303	2.15819	91.0869	40.5301	83.4952	0	61.724	0	122.859	44.3823	157.648	37.0083
71.1355	24.4396	82.7258	44.4902	79.8323	27.4745	61.7193	13.9751	112.53	36.7401	112.874	31.929
73.625	23.2819	67.2541	37.7941	84.3458	29.7918	63.4502	20.6793	122.469	42.3212	126.594	23.2778
78.6375	16.9001	57.679	39.4598	79.2313	14.7105	35.7049	7.18366	107.299	48.8549	115.143	18.0051
79.5822	40.9238	82.5228	42.4693	90.3895	43.3669	69.4944	36.2697	124.273	36.4156	114.888	44.1523
71.2871	39.2017	76.8071	41.6555	81.4381	44.2561	62.1485	34.1068	102.5	43.7708	87.7196	55.4558
69.198	37.1483	59.4768	36.91	69.2654	47.4608	50.8155	43.8674	91.1659	42.0683	99.5127	48.0418
56.7774	45.9646	62.7992	52.6071	56.7891	52.2848	65.3049	53.3904	97.3687	48.305	107.48	64.6611
68.3796	54.2638	60.4568	54.2641	67.7078	50.3075	71.3857	46.1815	88.5657	36.5939	93.0094	48.8878
52.0189	30.2029	56.2086	18.8892	75.0455	38.0472	73.3142	28.5482	133.249	19.3469	138.485	23.0207
65.7865	13.3079	41.88	0	80.9648	28.843	65.3499	11.8659	120.18	26.5244	131.626	33.4838
65.7143	28.7113	44.54	4.52767	61.8291	34.6316	49.0169	12.5948	117.895	30.2118	124.772	28.3391
66.4712	34.4554	52.9427	42.3955	80.346	29.8656	72.1732	20.8151	122.206	36.5648	136.002	33.3369
70.4464	21.5193	53.7599	3.86592	68.7428	23.9302	58.9298	0	100.021	38.705	113.112	49.2688
92.7185	52.5052	68.5182	51.3545	100.764	41.1012	83.4734	45.2626	145.208	79.5521	100.608	48.9878
80.6686	50.1821	72.4857	51.3696	80.2202	42.5822	81.5813	53.3324	132.354	53.1974	114.103	36.4659
87.5687	42.5991	55.4863	38.5824	79.4302	52.83	89.8618	60.3997	104.294	38.809	79.5483	34.2946
85.8015	54.9993	78.2252	54.614	55.1987	45.9584	77.128	36.8529	104.94	46.7403	84.3752	52.3826
72.6912	35.929	80.1069	53.4618	53.1343	52.3836	89.7086	53.3247	112.816	49.1574	85.6283	50.9785
66.131	39.8231	49.2486	0	76.6823	30.8858	82.7986	25.4692	113.511	31.3527	104.62	63.9849
84.0318	37.0106	62.7428	0	89.3706	27.4167	65.9962	40.4329	143.591	46.5271	128.273	54.862
69.5226	39.4642	51.899	0	83.4409	35.3073	58.806	41.4167	112.788	36.9687	116.79	36.7787
68.3615	37.4288	56.1543	0	81.1255	40.695	77.6785	53.3686	131.881	31.6817	118.557	44.1605
62.0607	30.9738	63.3956	0	72.1178	34.2355	58.4787	36.3669	118.084	35.8708	106.22	54.7305

## Sheet: Sheet4
bk	-994.596	43.5646	39.0312		-993.219	43.8077	41.2475			-994.836	61.3255	59.0818		-994.71	63.4538	60.3575		-996.358	35.3151	36.3362		-994.589	43.8706	40.8095		-995.541	66.4666	63.446		-994.792	67.2781	62.4477	-995.257	37.9493	37.2608		-993.893	38.4388	36.4006		-998.008	69.0607	65.8677		-996.208	62.3111	64.0711
	-994.88	37.1516			-993.978	41.8771				-994.313	60.1735			-993.504	60.6239			-996.111	37.6645			-994.74	39.4626			-994.64	62.9637			-994.824	61.7943		-994.998	36.2459			-995.382	32.977			-996.856	62.5682			-995.836	63.7739
	-997.01	35.8807			-993.562	39.9236				-994.561	57.6068			-993.229	55.2434			-996.747	36.4035			-993.755	42.0721			-993.732	64.7127			-994.532	62.8832		-994.696	36.5313			-993.871	35.7887			-994.865	62.1113			-994.85	62.9167
	-996.327	38.1543			-992.907	39.9456				-994.019	56.0886			-994.841	55.8962			-997.065	37.5045			-994.417	40.1354			-992.675	61.7241			-994.806	60.1412		-993.714	37.3616			-994.783	37.7313			-995.026	66.9338			-994.032	66.3257
	-995.029	40.405			-994.944	40.6834				-994.11	60.2145			-993.611	66.57			-996.282	34.7933			-994.764	38.5065			-995.232	61.3627			-994.888	60.1414		-995.861	38.2159			-995.378	37.0671			-995.734	68.6647			-997.01	65.0283
	-993.743	40.5966	41.2331		-995.227	37.8017	38.4877			-993.737	60.8875	63.1067		-995.754	59.0589	59.2477		-995.335	32.8887	34.1314		-995.299	38.7281	37.0831		-995.678	58.2481	60.4646		-995.926	60.0337	57.5512	-996.303	36.5142	37.6856		-995.486	36.4053	39.6053		-997.726	60.4598	63.0959		-995.032	62.3303	63.447
	-993.109	38.7286			-993.984	38.5327				-993.122	61.6072			-994.062	58.1908			-993.844	35.3286			-994.904	36.7389			-993.182	63.9221			-994.707	57.1269		-996.62	39.0455			-995.104	40.1645			-996.889	67.7749			-995.2	63.3851
	-993.889	41.077			-996.083	37.2694				-994.096	64.1462			-996.651	58.1072			-994.398	31.8388			-996.016	35.9128			-995.122	58.0842			-996.476	55.8892		-995.524	37.2558			-993.904	41.0753			-995.66	62.629			-994.181	65.1859
	-993.492	41.9147			-996.065	38.1868				-993.613	63.8209			-996.237	60.1588			-993.286	36.2373			-996.114	36.7797			-992.781	64.2152			-996.275	56.3555		-994.852	36.8809			-994.43	41.1265			-994.807	60.4909			-994.976	65.686
	-993.411	43.8485			-993.701	40.6481				-993.388	65.0719			-992.873	60.7225			-993.693	34.3638			-996.546	37.2561			-993.784	57.8533			-996.969	58.3507		-996.008	38.7316			-996.585	39.2548			-994.66	64.1249			-996.832	60.6477
	-994.771	34.0599	33.3257		-994.674	36.0806	33.652			-994.728	66.7763	60.2668		-993.28	66.7032	62.6804		-994.743	41.8423	41.3165		-995.394	35.433	36.4078		-996.507	57.906	57.9259		-995.297	57.8449	57.7811	-997.118	38.3379	36.3859		-996.368	38.7585	39.2477		-994.945	69.0549	69.5407		-993.381	74.6445	66.5451
	-994.087	32.9291			-993.666	32.2742				-995.076	57.7903			-994.381	64.0661			-994.062	41.6705			-994.884	34.797			-996.024	59.867			-995.102	55.583		-996.569	33.2649			-996.004	40.5694			-994.527	71.5367			-995.693	60.2364
	-994.37	32.8621			-993.373	31.6845				-997.473	55.454			-993.546	61.1513			-993.625	41.4404			-994.331	35.6767			-996.986	58.4346			-994.595	56.5421		-995.003	34.6597			-995.004	37.0107			-994.554	67.4305			-993.516	63.2984
	-994.022	31.6796			-994.634	32.394				-996.576	59.0004			-993.159	59.8319			-993.176	40.141			-995.323	39.4997			-997.443	57.3913			-995.871	60.5661		-995.402	38.5225			-994.415	40.1828			-993.316	68.8358			-994.963	67.8078
	-994.257	35.0976			-993.651	35.8268				-995.106	62.313			-995.721	61.6493			-994.786	41.4882			-996.071	36.6323			-996.458	56.0305			-995.903	58.3694		-995.139	37.1447			-996.956	39.7171			-995.554	70.8458			-994.519	66.7385

## Sheet: Sheet5
18.282	17.1364	27.9037	32.5655	14.84	17.2208	28.7761	30.6949	16.9655	17.2099	32.7845	32.3324										43.5646	43.8077	61.3255	63.4538	35.3151	43.8706	66.4666	67.2781	37.9493	38.4388	69.0607	62.3111
18.7424	15.9726	30.302	33.7169	14.7364	19.2976	27.7329	33.5321	17.4708	18.1106	32.9172	35.469										37.1516	41.8771	60.1735	60.6239	37.6645	39.4626	62.9637	61.7943	36.2459	32.977	62.5682	63.7739
19.0924	16.5998	29.3613	30.1326	15.2632	18.8761	30.6811	29.6107	17.3028	16.7537	31.7993	30.9029										35.8807	39.9236	57.6068	55.2434	36.4035	42.0721	64.7127	62.8832	36.5313	35.7887	62.1113	62.9167
15.7636	18.1537	27.328	29.569	15.6837	19.1861	28.1655	29.4005	17.8091	16.3839	33.5236	30.2672										38.1543	39.9456	56.0886	55.8962	37.5045	40.1354	61.7241	60.1412	37.3616	37.7313	66.9338	66.3257
17.2432	17.6107	30.3077	32.53	15.1419	17.9259	27.921	28.5962	17.3105	18.8616	31.6929	37.6883										40.405	40.6834	60.2145	66.57	34.7933	38.5065	61.3627	60.1414	38.2159	37.0671	68.6647	65.0283
16.7677	16.0618	29.7818	31.6532	15.801	16.7314	29.2702	33.1541	17.8689	19.6177	35.1167	41.2922										40.5966	37.8017	60.8875	59.0589	32.8887	38.7281	58.2481	60.0337	36.5142	36.4053	60.4598	62.3303
17.6484	16.5177	31.3402	29.615	15.4818	17.9405	28.3594	37.5277	17.1822	22.1741	32.6714	35.8468										38.7286	38.5327	61.6072	58.1908	35.3286	36.7389	63.9221	57.1269	39.0455	40.1645	67.7749	63.3851
17.4474	16.6179	29.9684	29.3386	15.1863	16.343	27.967	31.7588	16.6244	20.2957	30.9349	36.1737										41.077	37.2694	64.1462	58.1072	31.8388	35.9128	58.0842	55.8892	37.2558	41.0753	62.629	65.1859
17.7923	17.3267	31.2919	30.2939	15.7838	16.0432	29.4442	32.4611	16.5572	18.9299	29.7223	34.4671										41.9147	38.1868	63.8209	60.1588	36.2373	36.7797	64.2152	56.3555	36.8809	41.1265	60.4909	65.686
17.1843	17.3851	29.9216	29.4916	16.1747	17.0439	28.938	34.4744	18.6245	19.2352	35.8123	33.7511										43.8485	40.6481	65.0719	60.7225	34.3638	37.2561	57.8533	58.3507	38.7316	39.2548	64.1249	60.6477
16.4383	16.6495	29.9614	34.494	16.3926	16.2748	28.2158	33.6769	19.1585	20.2622	35.0115	38.4189										34.0599	36.0806	66.7763	66.7032	41.8423	35.433	57.906	57.8449	38.3379	38.7585	69.0549	74.6445
15.2029	15.726	26.6546	29.0476	15.321	17.8444	28.395	31.3506	19.8389	21.1187	35.3496	37.3399										32.9291	32.2742	57.7903	64.0661	41.6705	34.797	59.867	55.583	33.2649	40.5694	71.5367	60.2364
15.8191	16.1177	33.2399	31.289	17.7098	15.9077	27.5487	30.1452	19.2108	20.1243	35.0305	35.733										32.8621	31.6845	55.454	61.1513	41.4404	35.6767	58.4346	56.5421	34.6597	37.0107	67.4305	63.2984
17.1061	15.285	33.0846	30.5369	16.337	15.7435	28.2177	33.2498	20.5977	18.1366	38.8198	32.5789										31.6796	32.394	59.0004	59.8319	40.141	39.4997	57.3913	60.5661	38.5225	40.1828	68.8358	67.8078
15.2686	17.6567	30.7943	31.8344	15.8771	15.0035	29.2091	32.7887	18.037	18.4423	32.3563	33.3547										35.0976	35.8268	62.313	61.6493	41.4882	36.6323	56.0305	58.3694	37.1447	39.7171	70.8458	66.7385
