# Supplementary material for: Metal artifact reduction combined with deep learning image reconstruction algorithm for CT image quality optimization: a phantom study
Source: PeerJ. 2025 Jun 4;13:e19516. doi: 10.7717/peerj.19516 (PMC12145087; doi:10.7717/peerj.19516)
Supplement: Supplemental Information 2 [file peerj-13-19516-s002.xlsx]

## Sheet: Sheet1
NOISE	dh-120-3-nomar	dh-120-3-mar	ar-120-3-nomar	ar-120-3-mar	dh-100-3-nomar	dh-100-3-mar	ar-100-3-nomar	ar-100-3-mar	dh-70-3-nomar	dh-70-3-mar	ar-70-3-nomar	ar-70-3-mar
3 msv	18.282	17.1364	27.9037	32.5655	14.84	17.2208	28.7761	30.6949	16.9655	17.2099	32.7845	32.3324
	18.7424	15.9726	30.302	33.7169	14.7364	19.2976	27.7329	33.5321	17.4708	18.1106	32.9172	35.469
	19.0924	16.5998	29.3613	30.1326	15.2632	18.8761	30.6811	29.6107	17.3028	16.7537	31.7993	30.9029
	15.7636	18.1537	27.328	29.569	15.6837	19.1861	28.1655	29.4005	17.8091	16.3839	33.5236	30.2672
	17.2432	17.6107	30.3077	32.53	15.1419	17.9259	27.921	28.5962	17.3105	18.8616	31.6929	37.6883
	16.7677	16.0618	29.7818	31.6532	15.801	16.7314	29.2702	33.1541	17.8689	19.6177	35.1167	41.2922
	17.6484	16.5177	31.3402	29.615	15.4818	17.9405	28.3594	37.5277	17.1822	22.1741	32.6714	35.8468
	17.4474	16.6179	29.9684	29.3386	15.1863	16.343	27.967	31.7588	16.6244	20.2957	30.9349	36.1737
	17.7923	17.3267	31.2919	30.2939	15.7838	16.0432	29.4442	32.4611	16.5572	18.9299	29.7223	34.4671
	17.1843	17.3851	29.9216	29.4916	16.1747	17.0439	28.938	34.4744	18.6245	19.2352	35.8123	33.7511
	16.4383	16.6495	29.9614	34.494	16.3926	16.2748	28.2158	33.6769	19.1585	20.2622	35.0115	38.4189
	15.2029	15.726	26.6546	29.0476	15.321	17.8444	28.395	31.3506	19.8389	21.1187	35.3496	37.3399
	15.8191	16.1177	33.2399	31.289	17.7098	15.9077	27.5487	30.1452	19.2108	20.1243	35.0305	35.733
	17.1061	15.285	33.0846	30.5369	16.337	15.7435	28.2177	33.2498	20.5977	18.1366	38.8198	32.5789
	15.2686	17.6567	30.7943	31.8344	15.8771	15.0035	29.2091	32.7887	18.037	18.4423	32.3563	33.3547
0.5 msv	43.5646	43.8077	61.3255	63.4538	35.3151	43.8706	66.4666	67.2781	37.9493	38.4388	69.0607	62.3111
	37.1516	41.8771	60.1735	60.6239	37.6645	39.4626	62.9637	61.7943	36.2459	32.977	62.5682	63.7739
	35.8807	39.9236	57.6068	55.2434	36.4035	42.0721	64.7127	62.8832	36.5313	35.7887	62.1113	62.9167
	38.1543	39.9456	56.0886	55.8962	37.5045	40.1354	61.7241	60.1412	37.3616	37.7313	66.9338	66.3257
	40.405	40.6834	60.2145	66.57	34.7933	38.5065	61.3627	60.1414	38.2159	37.0671	68.6647	65.0283
	40.5966	37.8017	60.8875	59.0589	32.8887	38.7281	58.2481	60.0337	36.5142	36.4053	60.4598	62.3303
	38.7286	38.5327	61.6072	58.1908	35.3286	36.7389	63.9221	57.1269	39.0455	40.1645	67.7749	63.3851
	41.077	37.2694	64.1462	58.1072	31.8388	35.9128	58.0842	55.8892	37.2558	41.0753	62.629	65.1859
	41.9147	38.1868	63.8209	60.1588	36.2373	36.7797	64.2152	56.3555	36.8809	41.1265	60.4909	65.686
	43.8485	40.6481	65.0719	60.7225	34.3638	37.2561	57.8533	58.3507	38.7316	39.2548	64.1249	60.6477
	34.0599	36.0806	66.7763	66.7032	41.8423	35.433	57.906	57.8449	38.3379	38.7585	69.0549	74.6445
	32.9291	32.2742	57.7903	64.0661	41.6705	34.797	59.867	55.583	33.2649	40.5694	71.5367	60.2364
	32.8621	31.6845	55.454	61.1513	41.4404	35.6767	58.4346	56.5421	34.6597	37.0107	67.4305	63.2984
	31.6796	32.394	59.0004	59.8319	40.141	39.4997	57.3913	60.5661	38.5225	40.1828	68.8358	67.8078
	35.0976	35.8268	62.313	61.6493	41.4882	36.6323	56.0305	58.3694	37.1447	39.7171	70.8458	66.7385
