# Supplementary material for: Metal artifact reduction combined with deep learning image reconstruction algorithm for CT image quality optimization: a phantom study
Source: PeerJ. 2025 Jun 4;13:e19516. doi: 10.7717/peerj.19516 (PMC12145087; doi:10.7717/peerj.19516)
Supplement: Supplemental Information 3 [file peerj-13-19516-s003.xlsx]

## Sheet: Sheet1
120 _3_DH_MAR	120 _3_AR50_MAR	100 _3_DH_MAR	100 _3_AR50_MAR	70 _3_DH_MAR	70 _3_AR50_MAR	120 _3_DH_noMAR	120 _3_AR50_no_MAR	100 _3_DH_no_MAR	100 _3_AR50_no_MAR	70 _3_DH_no_MAR	70 _3_AR50_no_MAR
10.339	15.0248	7.83907	12.8173	15.898	23.3792	10.832	10.6539	9.65754	7.85324	5.60135	7.89627
20.719	18.7282	19.3402	11.4697	20.0277	17.5377	17.2426	11.2373	9.47481	11.2498	5.6144	5.75179
1.99444	2.52563	1.91772	2.67841	2.67219	2.36131	2.50918	1.65144	2.38132	2.05944	2.47525	2.52553
34.8571	28.2548	34.8991	22.2468	30.3044	18.4895	25.6658	19.3942	25.7154	23.7844	24.99	21.211
3.10508	3.03184	2.66357	2.54932	3.56204	1.88349	2.70911	2.93642	2.44179	1.76278	2.60078	2.00118
14.1114	16.8789	13.0637	25.9127	17.4498	18.0653	16.3004	21.8045	15.681	14.6788	11.4517	13.4468
17.0562	26.8267	18.1682	22.1513	24.1895	13.0104	18.1732	43.1954	19.1755	28.6658	13.3319	11.8543
10.852	14.0205	10.7441	12.8145	13.1791	15.6469	7.94155	11.9284	7.4762	6.76577	7.13308	10.6109
22.6923	19.966	22.126	15.3714	20.0372	18.6123	16.4583	14.9327	10.5848	8.50327	6.1202	8.34244
2.10857	1.64325	2.23545	2.30877	2.80952	2.69646	2.15568	1.89428	2.00506	1.79612	2.25297	1.91147
33.1058	22.4403	32.4807	23.6773	34.793	23.762	25.8217	21.8285	19.6703	13.9256	22.2118	18.7898
2.95833	2.89895	3.33646	3.1056	3.8575	2.69161	2.84957	2.2529	2.30507	1.60558	2.76096	2.07162
13.3713	16.7771	17.6515	21.0451	13.0237	16.496	10.0177	16.9576	10.9388	14.7415	12.7734	16.4543
17.1977	17.7862	12.5523	12.951	14.9874	15.7477	18.0183	14.1101	17.0677	20.6131	17.6164	35.252
14.3516	15.1211	10.7126	9.42661	9.66359	17.4496	10.1197	11.5063	6.02658	11.0875	7.44767	7.13226
21.2711	18.5901	16.8237	13.599	10.6145	9.1442	11.4068	13.2366	10.747	12.7255	6.93256	7.42619
2.21283	2.35686	2.25754	1.87515	2.47193	2.16411	2.22202	2.36501	2.44672	1.8473	2.67827	2.37985
30.551	22.9287	29.4534	31.4869	32.5076	22.0086	24.0519	21.8768	27.9579	19.1744	29.7262	18.0534
3.57537	3.21902	4.00363	1.59539	4.21951	2.76821	3.48925	1.84813	2.48153	2.09447	4.24424	3.02601
15.5633	21.1359	17.0975	17.9183	17.787	19.0237	17.0416	17.9148	11.1722	20.975	15.0765	18.648
50.3457	34.2264	18.7039	12.5654	8.40634	7.7957	51.9317	19.7502	66.3067	17.9331	18.1843	19.0889
8.18681	6.97184	6.7053	6.78103	7.61501	8.00135	6.51244	7.24805	5.9112	7.66657	4.07095	7.59906
10.5735	12.0972	9.63916	7.14869	9.5901	8.65626	9.30355	9.641	7.80163	7.76408	4.09598	6.28864
2.11087	1.53712	2.26924	1.3019	2.20893	0.97045	2.33103	1.68475	2.346	1.66505	2.84299	0.99952
12.0329	13.1459	15.4332	11.9249	15.2038	11.3792	13.4426	8.37651	14.9624	12.644	13.7861	11.5585
1.8813	1.12491	1.76565	0.984213	2.67653	1.31858	2.01069	1.10594	2.35004	0.837817	2.18658	1.15274
6.28881	8.39388	7.61257	8.72448	8.57943	8.34841	7.37978	8.71931	7.09322	7.94994	6.47235	9.04242
21.1536	8.878	16.6091	23.1713	11.0102	11.4624	10.1731	9.01328	19.9422	6.70112	19.5787	10.118
8.75277	8.3142	5.45272	6.57058	5.75175	8.57187	6.31937	7.07033	4.99901	4.99901	6.45808	7.22601
12.6901	11.0032	12.9981	12.3223	15.0673	10.9735	7.5412	8.88729	6.74077	6.74077	5.74288	5.6565
2.15722	1.55414	2.22667	1.43652	2.14386	1.62987	2.16146	1.57483	3.12118	3.12118	2.24692	0.959954
15.8006	12.9307	14.9813	12.4397	13.4014	9.15999	13.3632	9.81028	13.9827	13.9827	13.7414	9.60005
2.52238	1.10125	2.45301	1.58884	1.96172	1.07414	1.77137	0.732265	2.6482	2.6482	2.11502	1.02104
10.0392	11.7532	9.11938	11.8226	7.436	8.4851	8.21142	9.07065	5.87478	5.87478	7.64425	10.9121
12.6432	14.1228	13.4341	12.3352	12.3301	11.482	10.3582	8.79745	14.283	14.283	24.7336	17.6646
5.58079	10.6043	5.69727	8.92808	6.23053	7.42653	5.61174	7.18558	5.64852	6.42936	5.51813	5.58686
14.9828	8.88124	12.7953	10.0804	9.58171	9.90737	8.91347	10.8083	7.2458	7.19564	6.39565	4.53066
2.14452	1.3062	1.84028	0.924484	1.94397	1.20319	2.56291	1.10526	2.29113	1.26711	2.44541	1.66208
14.7142	10.4479	17.5702	12.8767	14.3667	10.4739	11.3732	8.79065	16.3261	9.99144	15.5852	9.75854
1.89598	1.0257	2.0061	1.02077	2.8721	1.06932	1.81093	1.27337	1.66137	1.41436	2.0741	1.42415
7.47579	7.489	6.94451	8.54642	6.74147	10.1139	6.76936	8.44988	6.90688	8.23806	7.81302	7.21182
8.44444	12.6157	17.0363	16.8673	12.1387	10.2556	11.0874	9.0928	8.43948	14.3196	14.5438	10.9209

## Sheet: Sheet3
120 _3_DH_noMAR	120 _3_DH_MAR	120 _3_AR50_no_MAR	120 _3_AR50_MAR	100 _3_DH_no_MAR	100 _3_DH_MAR	100 _3_AR50_no_MAR	100 _3_AR50_MAR	70 _3_DH_no_MAR	70 _3_DH_MAR	70 _3_AR50_no_MAR	70 _3_AR50_MAR
10.832	10.339	10.6539	15.0248	9.65754	7.83907	7.85324	12.8173	5.60135	15.898	7.89627	23.3792
17.2426	20.719	11.2373	18.7282	9.47481	19.3402	11.2498	11.4697	5.6144	20.0277	5.75179	17.5377
2.50918	1.99444	1.65144	2.52563	2.38132	1.91772	2.05944	2.67841	2.47525	2.67219	2.52553	2.36131
25.6658	34.8571	19.3942	28.2548	25.7154	34.8991	23.7844	22.2468	24.99	30.3044	21.211	18.4895
2.70911	3.10508	2.93642	3.03184	2.44179	2.66357	1.76278	2.54932	2.60078	3.56204	2.00118	1.88349
16.3004	14.1114	21.8045	16.8789	15.681	13.0637	14.6788	25.9127	11.4517	17.4498	13.4468	18.0653
18.1732	17.0562	43.1954	26.8267	19.1755	18.1682	28.6658	22.1513	13.3319	24.1895	11.8543	13.0104
7.94155	10.852	11.9284	14.0205	7.4762	10.7441	6.76577	12.8145	7.13308	13.1791	10.6109	15.6469
16.4583	22.6923	14.9327	19.966	10.5848	22.126	8.50327	15.3714	6.1202	20.0372	8.34244	18.6123
2.15568	2.10857	1.89428	1.64325	2.00506	2.23545	1.79612	2.30877	2.25297	2.80952	1.91147	2.69646
25.8217	33.1058	21.8285	22.4403	19.6703	32.4807	13.9256	23.6773	22.2118	34.793	18.7898	23.762
2.84957	2.95833	2.2529	2.89895	2.30507	3.33646	1.60558	3.1056	2.76096	3.8575	2.07162	2.69161
10.0177	13.3713	16.9576	16.7771	10.9388	17.6515	14.7415	21.0451	12.7734	13.0237	16.4543	16.496
18.0183	17.1977	14.1101	17.7862	17.0677	12.5523	20.6131	12.951	17.6164	14.9874	35.252	15.7477
10.1197	14.3516	11.5063	15.1211	6.02658	10.7126	11.0875	9.42661	7.44767	9.66359	7.13226	17.4496
11.4068	21.2711	13.2366	18.5901	10.747	16.8237	12.7255	13.599	6.93256	10.6145	7.42619	9.1442
2.22202	2.21283	2.36501	2.35686	2.44672	2.25754	1.8473	1.87515	2.67827	2.47193	2.37985	2.16411
24.0519	30.551	21.8768	22.9287	27.9579	29.4534	19.1744	31.4869	29.7262	32.5076	18.0534	22.0086
3.48925	3.57537	1.84813	3.21902	2.48153	4.00363	2.09447	1.59539	4.24424	4.21951	3.02601	2.76821
17.0416	15.5633	17.9148	21.1359	11.1722	17.0975	20.975	17.9183	15.0765	17.787	18.648	19.0237
51.9317	50.3457	19.7502	34.2264	66.3067	18.7039	17.9331	12.5654	18.1843	8.40634	19.0889	7.7957
6.51244	8.18681	7.24805	6.97184	5.9112	6.7053	7.66657	6.78103	4.07095	7.61501	7.59906	8.00135
9.30355	10.5735	9.641	12.0972	7.80163	9.63916	7.76408	7.14869	4.09598	9.5901	6.28864	8.65626
2.33103	2.11087	1.68475	1.53712	2.346	2.26924	1.66505	1.3019	2.84299	2.20893	0.99952	0.97045
13.4426	12.0329	8.37651	13.1459	14.9624	15.4332	12.644	11.9249	13.7861	15.2038	11.5585	11.3792
2.01069	1.8813	1.10594	1.12491	2.35004	1.76565	0.837817	0.984213	2.18658	2.67653	1.15274	1.31858
7.37978	6.28881	8.71931	8.39388	7.09322	7.61257	7.94994	8.72448	6.47235	8.57943	9.04242	8.34841
10.1731	21.1536	9.01328	8.878	19.9422	16.6091	6.70112	23.1713	19.5787	11.0102	10.118	11.4624
6.31937	8.75277	7.07033	8.3142	4.99901	5.45272	4.99901	6.57058	6.45808	5.75175	7.22601	8.57187
7.5412	12.6901	8.88729	11.0032	6.74077	12.9981	6.74077	12.3223	5.74288	15.0673	5.6565	10.9735
2.16146	2.15722	1.57483	1.55414	3.12118	2.22667	3.12118	1.43652	2.24692	2.14386	0.959954	1.62987
13.3632	15.8006	9.81028	12.9307	13.9827	14.9813	13.9827	12.4397	13.7414	13.4014	9.60005	9.15999
1.77137	2.52238	0.732265	1.10125	2.6482	2.45301	2.6482	1.58884	2.11502	1.96172	1.02104	1.07414
8.21142	10.0392	9.07065	11.7532	5.87478	9.11938	5.87478	11.8226	7.64425	7.436	10.9121	8.4851
10.3582	12.6432	8.79745	14.1228	14.283	13.4341	14.283	12.3352	24.7336	12.3301	17.6646	11.482
5.61174	5.58079	7.18558	10.6043	5.64852	5.69727	6.42936	8.92808	5.51813	6.23053	5.58686	7.42653
8.91347	14.9828	10.8083	8.88124	7.2458	12.7953	7.19564	10.0804	6.39565	9.58171	4.53066	9.90737
2.56291	2.14452	1.10526	1.3062	2.29113	1.84028	1.26711	0.924484	2.44541	1.94397	1.66208	1.20319
11.3732	14.7142	8.79065	10.4479	16.3261	17.5702	9.99144	12.8767	15.5852	14.3667	9.75854	10.4739
1.81093	1.89598	1.27337	1.0257	1.66137	2.0061	1.41436	1.02077	2.0741	2.8721	1.42415	1.06932
6.76936	7.47579	8.44988	7.489	6.90688	6.94451	8.23806	8.54642	7.81302	6.74147	7.21182	10.1139
11.0874	8.44444	9.0928	12.6157	8.43948	17.0363	14.3196	16.8673	14.5438	12.1387	10.9209	10.2556

## Sheet: SNR
3 msv	120 _3_DH_noMAR	120 _3_DH_MAR	120 _3_AR50_no_MAR	120 _3_AR50_MAR	100 _3_DH_no_MAR	100 _3_DH_MAR	100 _3_AR50_no_MAR	100 _3_AR50_MAR	70 _3_DH_no_MAR	70 _3_DH_MAR	70 _3_AR50_no_MAR	70 _3_AR50_MAR
	10.832	10.339	10.6539	15.0248	9.65754	7.83907	7.85324	12.8173	5.60135	15.898	7.89627	23.3792
	17.2426	20.719	11.2373	18.7282	9.47481	19.3402	11.2498	11.4697	5.6144	20.0277	5.75179	17.5377
	25.6658	34.8571	19.3942	28.2548	25.7154	34.8991	23.7844	22.2468	24.99	30.3044	21.211	18.4895
	16.3004	14.1114	21.8045	16.8789	15.681	13.0637	14.6788	25.9127	11.4517	17.4498	13.4468	18.0653
	7.94155	10.852	11.9284	14.0205	7.4762	10.7441	6.76577	12.8145	7.13308	13.1791	10.6109	15.6469
	16.4583	22.6923	14.9327	19.966	10.5848	22.126	8.50327	15.3714	6.1202	20.0372	8.34244	18.6123
	25.8217	33.1058	21.8285	22.4403	19.6703	32.4807	13.9256	23.6773	22.2118	34.793	18.7898	23.762
	10.1197	14.3516	11.5063	15.1211	6.02658	10.7126	11.0875	9.42661	7.44767	9.66359	7.13226	17.4496
	11.4068	21.2711	13.2366	18.5901	10.747	16.8237	12.7255	13.599	6.93256	10.6145	7.42619	9.1442
	24.0519	30.551	21.8768	22.9287	27.9579	29.4534	19.1744	31.4869	29.7262	32.5076	18.0534	22.0086
	17.0416	15.5633	17.9148	21.1359	11.1722	17.0975	20.975	17.9183	15.0765	17.787	18.648	19.0237
0.5 mSv	6.51244	8.18681	7.24805	6.97184	5.9112	6.7053	7.66657	6.78103	4.07095	7.61501	7.59906	8.00135
	9.30355	10.5735	9.641	12.0972	7.80163	9.63916	7.76408	7.14869	4.09598	9.5901	6.28864	8.65626
	13.4426	12.0329	8.37651	13.1459	14.9624	15.4332	12.644	11.9249	13.7861	15.2038	11.5585	11.3792
	7.37978	6.28881	8.71931	8.39388	7.09322	7.61257	7.94994	8.72448	6.47235	8.57943	9.04242	8.34841
	6.31937	8.75277	7.07033	8.3142	4.99901	5.45272	4.99901	6.57058	6.45808	5.75175	7.22601	8.57187
	7.5412	12.6901	8.88729	11.0032	6.74077	12.9981	6.74077	12.3223	5.74288	15.0673	5.6565	10.9735
	13.3632	15.8006	9.81028	12.9307	13.9827	14.9813	13.9827	12.4397	13.7414	13.4014	9.60005	9.15999
	8.21142	10.0392	9.07065	11.7532	5.87478	9.11938	5.87478	11.8226	7.64425	7.436	10.9121	8.4851
	5.61174	5.58079	7.18558	10.6043	5.64852	5.69727	6.42936	8.92808	5.51813	6.23053	5.58686	7.42653
	8.91347	14.9828	10.8083	8.88124	7.2458	12.7953	7.19564	10.0804	6.39565	9.58171	4.53066	9.90737
	11.3732	14.7142	8.79065	10.4479	16.3261	17.5702	9.99144	12.8767	15.5852	14.3667	9.75854	10.4739
	6.76936	7.47579	8.44988	7.489	6.90688	6.94451	8.23806	8.54642	7.81302	6.74147	7.21182	10.1139

## Sheet: Sheet2
DH_120KVP_MAR_3	Mean	StandardDeviation		AR50_120 kVp_MAR_3	Mean	StandardDeviation		DH_100KVP_MAR_3	Mean	StandardDeviation		AR50_100KVP_MAR_3	Mean	StandardDeviation		DH_70KVP_MAR_3	Mean	StandardDeviation		AR50_70KVP_MAR_3	Mean	StandardDeviation		DH_120_nomar_3	Mean	StandardDeviation		AR50_120_nomar_3	Mean	StandardDeviation		DH_100_nomar_3	Mean	StandardDeviation		AR50_100_nomar_3	Mean	StandardDeviation		DH_70_nomar_3	Mean	StandardDeviation		AR50_70_nomar_3	Mean	StandardDeviation
	-631.958	61.1239			-662.25	44.0773			-655.542	83.6249			-700.042	54.6168			-658	41.3889			-691.292	29.5686			-630.542	58.211			-618.25	58.0302			-592.042	61.3036			-637.708	81.2032			-599.125	106.961			-621.75	78.7397
	-817.273	39.4456			-819.455	43.7551			-813.364	42.0556			-808.848	70.5204			-840.061	41.9449			-843.333	48.0869			-773	44.8309			-747.152	66.4883			-727.182	76.749			-755.818	67.1851			-688.97	122.715			-701.212	121.912
	107.517	53.9084			89.5862	35.4708			103.207	53.8174			96.7586	36.1254			133.379	49.9138			112.724	47.738			136.966	54.5858			116.31	70.4299			137.552	57.7628			119.207	57.8831			134.276	54.2474			117.552	46.5454
	-825.206	23.674			-825.127	29.2031			-833.508	23.8834			-833.095	37.4479			-823.175	27.1635			-829.81	44.8801			-813.937	31.7129			-812.968	41.9181			-823.349	32.0177			-833.46	35.0423			-842.127	33.6986			-848.762	40.0152
	101.942	32.8308			98.1154	32.3617			87.8654	32.9878			100.769	39.5279			113.865	31.9663			106.327	56.4522			87.3462	32.2417			94.6731	32.241			78.0385	31.9595			73.8654	41.9028			96.5192	37.1116			88.2115	44.0798
	-647.75	45.9026			-649.944	38.5064			-643.111	49.2288			-648.972	25.0445			-648.139	37.1431			-647.556	35.8453			-630.889	38.7038			-648	29.7187			-629.75	40.1599			-635.306	43.2804			-642.472	56.1027			-643.056	47.8223
	183.667	38.6954			131.667	82.0995			163.667	44.7698			133.667	33.5012			225	56.4004			171.667	42.6654			241.667	56.1278			119.667	62.8835			213.333	59.1805			142	45.0777			258.667	73.1049			209.333	60.0528
	-758.833	44.4901			-792	29.5229			-783.167	43.1065			-814.333	36.7623			-801.167	33.1205			-828.333	63.6668			-779.833	42.9111			-820.333	18.9912			-676	35.2534			-787.5	27.4718			-763.833	57.2937			-823.833	69.4965
	-298.5	210.011			-515.5	129.401			-298.5	258.094			-504	185.262			-331	255.973			-670.5	108.187			-310	155.563			-593	98.9949			-338	158.392			-493.5	64.3467			-192	339.411			-515	239.002
	-817.429	24.7066			-823	27.101			-801.929	58.3576			-829.714	27.3873			-804.857	23.945			-813.929	17.4729			-808	40.2492			-809.857	30.199			-803.714	18.9186			-821.857	49.4646			-802.357	40.0742			-810.357	36.462
	-558.25	34.1894			-638	32.5883			-551.75	21.1719			-639	28.4956			-511.5	17.8979			-603	14.1657			-540.5	51.7462			-661.75	24.0191			-553.5	21.0159			-657	46.6833			-504.75	23.0127			-601.5	35.3034
	101.85	14.6181			105.633	28.0266			106.367	15.7878			110.883	30.5703			131.45	13.2977			135.35	26.6794			99.7833	16.8272			98.5167	32.2367			110.967	17.5112			110.567	26.7464			132.967	15.0951			136.533	26.9648
	-648.552	37.2059			-645.119	30.2121			-643.687	33.9662			-644.418	33.3772			-641.03	44.3816			-636.149	39.2773			-647.119	41.708			-645.388	27.0185			-645.448	41.3662			-639.448	27.0971			-637.358	49.1426			-633.433	48.8452
	-650.833	59.9737			-674.75	48.126			-641.625	59.7188			-671.583	52.408			-645.583	48.9853			-673.875	43.0675			-625.542	78.7682			-656.417	55.0296			-590	78.9171			-617.417	91.2559			-603.833	84.6526			-635.75	59.9146
	-822.576	36.2492			-824.121	41.2763			-816.273	36.892			-814.848	53.0107			-841.606	42.0022			-842.97	45.2911			-758.788	46.1037			-763.909	51.1568			-716.909	67.7303			-724.091	85.1544			-698.455	114.123			-708.061	84.8745
	110.241	52.2826			89.4828	54.4548			133.552	59.7427			121.034	52.4237			135.793	48.3332			110.241	40.8837			126.862	58.8501			104.724	55.2843			129.448	64.5609			117.379	65.3515			129.586	57.518			106	55.4546
	-821.444	24.8127			-827.254	36.8646			-823.413	25.3509			-823.127	34.7644			-830.048	23.8567			-834.476	35.1182			-818.46	31.6966			-823.73	37.7364			-829.175	42.1535			-830.302	59.624			-833.937	37.5448			-840.159	44.7135
	99.7115	33.7054			93.5385	32.2663			103	30.871			96.0385	30.9243			133.692	34.6577			125.769	46.7264			85.2692	29.9235			77.9808	34.6135			88.5385	38.4103			86.7308	54.0182			102.942	37.285			94.4038	45.5701
	-651.806	48.7465			-652.778	38.9088			-646.833	36.6446			-647.389	30.762			-639	49.0644			-642.694	38.9607			-630.361	62.925			-628.194	37.045			-631.583	57.738			-628.778	42.6535			-636.667	49.8432			-636.944	38.7099
	172.667	36.6652			110.333	85.4244			236	85.0823			185.667	154.798			216.333	35.3034			175.333	13.6504			198.667	34.8186			136	69.0869			245	82.3954			216	84.788			252.667	41.6213			165	38.4318
	-760.5	44.221			-798.5	44.8943			-803.333	63.999			-834.167	64.4094			-788	52.5776			-819	52.0077			-797.167	44.2421			-827.167	58.6222			-754.667	44.2161			-788.667	38.2605			-776	44.05			-829.333	23.5259
	-327	168.291			-519	45.2548			-290	207.889			-468.5	75.6604			-284.5	245.366			-587.5	85.5599			-380	176.777			-552	49.4975			-375.5	129.401			-601	43.8406			-249.5	255.266			-581.5	129.401
	-809.286	36.8812			-819.286	36.1374			-807	27.8153			-814.071	24.5998			-806.357	46.389			-816.5	40.4641			-801.286	44.6102			-809.143	39.4361			-797.286	38.3575			-802.214	41.3506			-797.571	25.3793			-800.071	27.7945
	-546.5	46.5152			-611.75	48.5961			-565.75	34.3839			-679	40.5545			-529.25	23.1571			-634.75	53.5125			-516.75	46.5143			-589.75	74.2221			-554.75	45.5513			-624	74.6726			-526.25	41.7722			-605.5	47.8226
	100.983	15.2987			103.467	27.3331			111.45	15.1058			113.967	26.9965			131.767	14.7146			134.833	32.0625			97.6167	17.2687			100.617	28.696			110.817	16.7175			113.75	28.0161			136.233	20.1186			138.017	38.46
	-648.716	40.2789			-648.239	36.5601			-644.925	36.3882			-641	35.705			-638.821	38.97			-637.269	39.8127			-648.06	45.3748			-643.179	39.4331			-641.896	39.7828			-639.806	35.0217			-637.134	40.1097			-633.522	35.4184
	-650.875	45.3521			-682.542	45.1384			-670.667	62.6055			-664.875	70.5317			-628.708	65.0595			-649	37.1928			-585.625	57.87			-666.208	57.8994			-610.417	101.287			-630.083	56.8284			-590.833	79.3313			-611.125	85.6846
	-808.758	38.0214			-812.273	43.6937			-806.636	47.9465			-817.485	60.1135			-855.848	80.6304			-853.242	93.3096			-734.788	64.4165			-780.848	58.9916			-748.576	69.6545			-739.03	58.0746			-665.818	96.0421			-676.576	91.1067
	114.241	51.6269			100.966	42.839			111.931	49.5811			86.069	45.8997			130.862	52.9391			108.897	50.3192			137.172	61.7333			121.034	51.1772			135.552	55.4015			118.862	64.3438			169.897	63.4352			151.069	63.4783
	-813.048	26.6128			-815.952	35.5865			-830.476	28.1962			-836.667	26.5719			-826.73	25.4319			-833.857	37.8877			-810.587	33.7016			-816.952	37.3434			-828.556	29.6358			-828.429	43.205			-833	28.0225			-835.984	46.3063
	107.577	30.0883			102.154	31.7344			111.154	27.7633			79.0962	49.5779			132.481	31.3972			126.154	45.5723			103.885	29.7728			77.3846	41.872			77.9423	31.409			70.9615	33.8804			134.75	31.7489			130.577	43.1515
	-653	41.9578			-651.5	30.8244			-650.278	38.0335			-643.083	35.8898			-640.972	36.0361			-638.694	33.5736			-649.361	38.1045			-622.639	34.7556			-639.472	57.2376			-630.306	30.0503			-636.389	42.2105			-639.056	34.2695
	186.333	12.3423			143	37.2424			186.333	31.7857			106.333	42.2532			259.667	41.0406			203	28.6182			197.667	28.1484			234.333	101.362			204	23.8118			152	92.8278			238.667	46.3069			176.333	67.5747
	-778	15.4532			-807.167	23.5832			-776.667	41.5243			-826.167	65.7493			-767.833	91.3398			-814	104.416			-791	15.2315			-806.5	40.835			-751.833	11.3387			-736	41.0414			-800.5	44.0216			-829.5	43.4546
	-347.5	89.8026			-577.5	50.2046			-285.5	228.395			-508	179.605			-286	239.002			-646	172.534			-382	138.593			-484.5	92.631			-279	169.706			-593.5	119.501			-274	224.86			-611	38.1838
	-804.929	36.6867			-812.571	39.3089			-818	34.8602			-809.571	37.5207			-811.357	37.5102			-821.5	28.7957			-806.071	44.8835			-809.929	35.8704			-818	43.9878			-809.071	19.582			-803.429	43.9663			-816.643	45.5979
	-543.25	12.7639			-624.25	27.1093			-539.5	24.2006			-644.75	40.9502			-544.5	23.6291			-648.5	24.0069			-576.5	35.6885			-658	40.5709			-560.25	50.7305			-673.25	18.9978			-502.5	14.2478			-583.75	10.1119
	102.067	13.1997			105.367	25.9987			107.117	14.551			109.233	27.421			131.633	17.084			133.617	31.2329			97.0667	14.7382			103.517	28.6513			107.967	14.2353			116.167	28.1817			131.75	16.9532			133.133	32.8852
	-647.851	34.173			-645.806	31.8711			-648.687	39.0606			-639.597	31.2405			-641.507	33.7798			-636.716	31.5354			-649.627	30.2434			-642.269	36.146			-642.03	32.0014			-642.328	39.0347			-638.433	40.8386			-632.955	32.5131
0.5 mSv	-611.885	74.7403			-668	95.814			-645.833	96.3168			-690.792	101.871			-617.083	81.0351			-659.75	82.4549			-585.625	89.924			-661.5	91.266			-575.708	97.3927			-651.417	84.9685			-623.625	153.189			-622.917	81.9729
	-822.676	77.8058			-835.265	69.046			-824.273	85.5129			-826.727	115.647			-821.424	85.6534			-853.485	98.5974			-745.424	80.1226			-721.515	74.8382			-721.242	92.4476			-753.848	97.0944			-618.303	150.954			-616.909	98.0989
	128.767	61.0018			97.1333	63.192			122.793	54.1119			94.4483	72.5463			137.172	62.099			107.172	110.436			133.241	57.16			139	82.505			142.69	60.8224			114	68.4664			171.345	60.2692			100.621	100.669
	-819.571	68.1106			-813.667	61.8951			-830.286	53.7987			-838.238	70.2933			-824.603	54.2365			-829.429	72.8898			-813.603	60.5242			-812.413	96.987			-825.73	55.1868			-834	65.9604			-821.508	59.5897			-840.143	72.6864
	99.6481	52.9678			83	73.7837			94.1346	53.3145			86.6346	88.0243			129.269	48.2973			114.942	87.1713			93.1538	46.3293			99.0577	89.5688			115.173	49.0089			72.4038	86.4197			118.385	54.1415			113.827	98.7444
	-642.5	102.166			-666.417	79.3932			-629.972	82.7542			-647.778	74.2483			-607.583	70.8186			-647.222	77.5264			-620.472	84.0773			-649.056	74.4388			-617.056	86.9923			-657.889	82.7539			-628.056	97.0366			-649.222	71.7974
	169	42.9302			170	24			216.333	35.473			158.333	37.018			183	60.025			150.333	3.78594			194.667	24.6644			166.333	45.4899			220.333	70.8896			266	94.3981			210.333	113.2			122	70.8872
	-818	38.6695			-778.75	87.7169			-758.833	45.6877			-771.667	33.3027			-851.833	77.3677			-809.167	70.593			-792.833	77.9344			-807.333	89.5716			-796.833	39.9571			-773.667	115.453			-788.167	40.2563			-869.167	85.9032
	-405.5	150.614			-447.5	341.533			-362.5	219.91			-560	240.416			-152.5	309.006			-395.5	157.685			-76	91.9239			-407.5	184.555			-248.5	178.898			-539.5	267.993			-128.5	260.922			-481.5	376.888
	-807.071	66.6985			-780.643	59.2149			-807.571	86.9684			-816.857	68.8899			-818.429	69.1417			-783.071	69.8828			-838.714	76.3115			-812.643	48.0842			-817.286	60.2411			-849.071	43.2479			-802.571	54.9653			-840.714	58.6835
	-559.75	35.0179			-665	64.8742			-554.75	67.776			-618.5	68.9758			-564.25	106.406			-633.5	112.988			-429.5	85.481			-639.75	21.7466			-514	54.1048			-532.25	53.4377			-448.25	69.6677			-648.25	32.5308
	96.15	33.9989			105.317	64.3522			107.233	28.3814			110.233	67.398			131.883	23.6235			125.933	90.4574			102.483	33.1885			98.6333	71.133			110.75	29.8701			112.817	73.4463			133.917	38.0247			135.783	63.3179
	-639.045	62.0968			-644.448	76.31			-634.06	79.8071			-637.478	80.0591			-634.149	93.5756			-635.627	78.8562			-639.388	91.8627			-644.448	80.0534			-647.104	74.0115			-640.612	78.0674			-634.731	73.0881			-634.955	76.1608
	-602.25	68.8068			-644.667	77.538			-640.958	117.548			-676.75	102.997			-601.292	104.541			-644	75.1295			-596.333	94.3659			-648	91.6506			-602.5	120.524			-602.5	120.524			-588.708	91.1585			-629.667	87.1389
	-834.788	65.7827			-836.242	76			-822.394	63.2702			-828.273	67.2176			-821.697	54.5352			-822.485	74.9517			-749.758	99.4215			-764.939	86.0712			-661.273	98.1005			-661.273	98.1005			-637.273	110.967			-647.788	114.521
	127.241	58.9841			111.414	71.6886			131.379	59.0027			104.379	72.6614			131.379	61.2818			118.655	72.8003			151.69	70.1794			134.724	85.5482			185.034	59.2835			185.034	59.2835			133.655	59.4837			90.4483	94.2215
	-818.905	51.8275			-827.349	63.9832			-824.905	55.0623			-824.222	66.2572			-833.746	62.2132			-839.46	91.6443			-818.254	61.232			-818.349	83.4176			-827.206	59.1592			-827.206	59.1592			-836.444	60.8705			-842.905	87.8021
	105.096	41.6655			91.5962	83.1743			116.538	47.5083			106.154	66.8121			115.462	58.8572			107.673	100.241			77.0385	43.4908			58.6923	80.1517			123.519	46.6428			123.519	46.6428			104.038	49.1903			99.2308	97.1858
	-639.083	63.6591			-658.694	56.0438			-624.694	68.5019			-643.889	54.4625			-654.361	87.9991			-666.917	78.5986			-628.639	76.5567			-642.167	70.7961			-616	104.855			-616	104.855			-611.972	80.0566			-635.139	58.2051
	199.667	44.5009			97.6667	54.5374			200.333	34.8186			125	63.1506			213.667	61.0273			162.333	106.397			185.667	72.5902			52.3333	73.7586			246	32.6956			246	32.6956			215.333	7.0946			69.6667	64.5006
	-798.333	63.1432			-793.167	56.162			-747.333	55.6297			-739	59.9099			-776.833	63.0029			-769.333	67.0035			-806.333	77.8451			-824.5	93.7203			-832.167	58.2629			-832.167	58.2629			-718.667	29.0563			-745.5	42.2031
	-500	89.0955			-667	19.799			-299.5	89.8026			-526	38.1838			-49	118.794			-305	131.522			-475	0			-633	87.6812			-177	203.647			-177	203.647			-64	315.37			-352.5	153.442
	-796	92.7503			-802	80.9387			-799.571	87.2739			-799.071	80.1561			-794.214	93.4733			-809.857	109.982			-792.857	50.8571			-807.643	51.7027			-816.286	78.9044			-816.286	78.9044			-798.071	64.2465			-804.571	62.4324
	-531.25	23.1138			-612.25	58.6252			-594	62.4553			-636.5	70.9671			-542.5	21.3931			-617	28.9252			-648	51.0947			-766	45.4019			-564.5	119.707			-564.5	119.707			-524.75	96.5656			-593.75	159.025
	106.8	29.4473			110.633	56.8838			110.133	35.9432			114.9	78.9994			132.45	29.7392			134.783	73.3148			96.1333	30.3072			93.7333	71.3936			109.017	28.4107			109.017	28.4107			129.833	30.8414			131.083	67.9115
	-647	70.9251			-653.224	69.5272			-639.388	72.1885			-646.806	65.6128			-627.761	75.3091			-632.03	71.5974			-639.269	92.9533			-645.627	89.9673			-639.478	78.2011			-639.478	78.2011			-618.463	96.2145			-628.09	97.1021
	-631.885	113.225			-651.692	61.4555			-635.083	111.472			-677	75.8282			-625.375	100.373			-650.042	87.5296			-624.792	111.337			-617.458	85.9302			-616.083	109.07			-615.542	95.7392			-591.125	107.124			-641.667	114.853
	-824.441	55.0257			-823.088	92.6771			-834.697	65.2344			-837.273	83.0592			-854.636	89.1946			-825.273	83.2989			-709.545	79.6037			-762.485	70.5461			-748.576	103.312			-727.152	101.054			-618.424	96.6944			-625.273	138.009
	123.4	57.5419			111.9	85.6683			123.759	67.2499			94.1379	101.827			140.069	72.053			103.552	86.0642			159.586	62.2676			97.6552	88.3553			139.724	60.9847			117.448	92.6898			144.345	59.0268			149.069	89.6883
	-810.175	55.0608			-826.19	79.0769			-820.111	46.6763			-824.079	63.9978			-822.81	57.2721			-832.905	79.5219			-807.762	71.0233			-812.349	92.4106			-829.365	50.7998			-827.746	82.8456			-834.222	53.5267			-825.921	84.6357
	95.5	50.3699			86.9444	84.7664			92.9231	46.3202			82.4615	80.784			132.442	46.1134			114.212	106.808			101.673	56.144			80.7885	63.4447			90.3654	54.3922			112.615	79.6229			119.904	57.8101			110.75	77.7658
	-652.667	87.3041			-657.5	87.7954			-650.417	93.6591			-674.333	78.9025			-624.139	92.5821			-636.806	62.9634			-628.861	92.8981			-648.25	76.7171			-632.806	91.6197			-640.694	77.7725			-625.417	80.048			-654.278	90.723
	205	25.0599			89.3333	52.5389			146.667	26.1024			21.3333	18.1475			206	14.9332			154	56.3205			221.667	47.7528			108	51.1175			269	81.9085			169.667	94.5216			221	73.8986			130	133.727
	-765.5	90.6513			-848.25	67.2378			-788.667	46.2933			-798.5	47.3403			-804.333	66.2621			-843.167	82.2154			-784.333	70.7408			-801.167	88.11			-781.833	92.64			-819.333	57.2177			-841.667	57.8711			-788.833	72.2313
	-247	244.659			-591.5	272.236			-169	172.534			-391.5	54.4472			-110.5	204.354			-327	299.813			-278.5	105.359			-330	65.0538			-328	278.6			-486.5	58.6899			-235.5	368.403			-409.5	166.17
	-764.643	71.2327			-813.429	64.6109			-814.786	62.6948			-816.214	65.9722			-783.571	71.3515			-822.071	66.8436			-805.714	49.2364			-846.071	74.5638			-835.786	53.2804			-830.571	57.799			-832.143	51.0759			-816.429	61.9624
	-596	50.1863			-641	48.7716			-551.75	46.3708			-650.5	21.7332			-560	95.4044			-640	110.98			-552	17.1853			-476.5	66.1337			-475.5	35.6791			-600	61.8277			-581	25.9743			-528.25	56.847
	105.65	29.4508			94.8667	67.9542			108.633	33.6855			107.433	78.4307			130.2	38.5772			131.8	52.5014			100.2	33.3084			102.167	74.5409			109.4	32.5843			114.083	66.1509			131.25	25.4962			139.25	84.3217
	-641.597	82.6279			-641.403	56.0638			-636.433	82.4969			-641.896	77.4296			-629.537	79.7373			-638.134	91.2829			-639.194	87.4165			-642.537	86.5559			-635.731	80.2969			-652.716	75.5316			-631.09	84.0137			-640.791	70.3828
