# Supplementary material for: Metal artifact reduction combined with deep learning image reconstruction algorithm for CT image quality optimization: a phantom study
Source: PeerJ. 2025 Jun 4;13:e19516. doi: 10.7717/peerj.19516 (PMC12145087; doi:10.7717/peerj.19516)
Supplement: Supplemental Information 4 [file peerj-13-19516-s004.xlsx]

## Sheet: Sheet1
noise						fpeak					Reference	favg
	ASIR-V 50	ASIR-V 50 MAR	DLIR	DLIR-H MAR			ASIR-V 50	ASIR-V 50 MAR	DLIR	DLIR-H MAR			ASIR-V 50	ASIR-V 50 MAR	DLIR	DLIR-H MAR
070-3	41.2	41.5	21.8	21.9		070-3	0.46	0.43	0.38	0.41		070-3	0.43	0.43	0.43	0.43
100-3	36.2	36.2	19.8	20.5		100-3	0.41	0.44	0.43	0.41		100-3	0.43	0.43	0.43	0.43
120-3	36.2	36	20.6	20.2		120-3	0.44	0.44	0.39	0.43	0.44	120-3	0.43	0.43	0.43	0.43	0.44
070-05	94.3	92.7	41.5	41.5		070-05	0.43	0.43	0.43	0.43		070-05	0.41	0.41	0.43	0.43
100-05	84.3	84.8	39.7	40.1		100-05	0.43	0.43	0.41	0.43		100-05	0.41	0.41	0.43	0.43
120-05	85.4	84.9	40.5	40.5		120-05	0.43	0.41	0.43	0.39		120-05	0.41	0.41	0.43	0.43
	ASIR-V 50	ASIR-V 50 MAR	DLIR	DLIR-H MAR			ASIR-V 50	ASIR-V 50 MAR	DLIR	DLIR-H MAR			ASIR-V 50	ASIR-V 50 MAR	DLIR	DLIR-H MAR
070-3	41.2	41.5	21.9	21.9		070-3	0.46	0.43	0.38	0.39		070-3	0.43	0.42	0.43	0.42
100-3	36.1	36.2	19.8	20.5		100-3	0.41	0.44	0.41	0.41		100-3	0.43	0.43	0.43	0.43
120-3	36.1	36	20.5	20.2		120-3	0.44	0.44	0.39	0.41		120-3	0.43	0.43	0.43	0.43
070-05	94.1	93.5	41.3	41.1		070-05	0.41	0.44	0.43	0.39		070-05	0.41	0.41	0.43	0.42
100-05	84.2	84.9	39.7	40.1		100-05	0.43	0.44	0.41	0.44		100-05	0.41	0.41	0.43	0.43
120-05	85.3	84.9	40.4	40.4		120-05	0.44	0.41	0.43	0.39		120-05	0.41	0.41	0.43	0.43
	ASIR-V 50	ASIR-V 50 MAR	DLIR	DLIR-H MAR			ASIR-V 50	ASIR-V 50 MAR	DLIR	DLIR-H MAR			ASIR-V 50	ASIR-V 50 MAR	DLIR	DLIR-H MAR
070-3	41.6	41.4	22	22		070-3	0.44	0.43	0.39	0.41		070-3	0.43	0.43	0.43	0.43
100-3	35.9	37.5	20	20.3		100-3	0.41	0.46	0.39	0.41		100-3	0.43	0.43	0.43	0.43
120-3	36.4	36.2	20.4	20.3		120-3	0.46	0.43	0.41	0.43		120-3	0.43	0.43	0.43	0.43
070-05	92.8	92.6	41.3	41.1		070-05	0.43	0.43	0.43	0.43		070-05	0.41	0.41	0.43	0.43
100-05	86.3	84.7	39.6	39.8		100-05	0.41	0.41	0.41	0.41		100-05	0.41	0.41	0.43	0.43
120-05	84.5	85.5	40.4	40.6		120-05	0.43	0.43	0.43	0.43		120-05	0.41	0.41	0.43	0.43
	ASIR-V 50	ASIR-V 50 MAR	DLIR	DLIR-H MAR			ASIR-V 50	ASIR-V 50 MAR	DLIR	DLIR-H MAR			ASIR-V 50	ASIR-V 50 MAR	DLIR	DLIR-H MAR
070-3	42.2	41.9	22.2	22.3		070-3	0.41	0.41	0.39	0.41		070-3	0.42	0.42	0.43	0.42
100-3	35.7	36.7	20.1	20.1		100-3	0.44	0.44	0.39	0.41		100-3	0.43	0.43	0.43	0.43
120-3	36.7	37.5	20.2	20.4		120-3	0.44	0.43	0.41	0.41		120-3	0.43	0.43	0.43	0.43
070-05	94.4	94.1	41.3	41.8		070-05	0.43	0.41	0.43	0.43		070-05	0.41	0.41	0.42	0.43
100-05	84.7	83.6	39.9	39.3		100-05	0.41	0.41	0.43	0.41		100-05	0.41	0.41	0.43	0.43
120-05	84.7	84.6	40.4	39.6		120-05	0.43	0.39	0.43	0.41		120-05	0.41	0.41	0.43	0.43
	fpeak	fav
	0.43	0.44			0.46	0.44	66.2			0.46	0.43	75.5
	0.43	0.44			0.46	0.44	67 .1			0.46	0.43	79
	0.46	0.44			0.43	0.44				0.44	0.43	78.5
